# Supplementary material for: A mechanism that produces dichotomy in melt pond coverage in sea ice floes
Source: Copernicus journal article supplement (doi:10.5194/tc-2016-7), 2016-02-29
Supplement: Supplementary file [file tc-2016-7-AC4-supplement.pdf]

# Response to reviewers

Predrag Popovic<sup>1</sup> and Dorian Abbot<sup>1</sup>

<sup>1</sup>University of Chicago, Dept. of Geophysical sciences

*Correspondence to:* Predrag Popovic (ppopovic@uchicago.edu)

Dear reviewer and editor,

We found the reviewer's comments very helpful, and we have made several major adjustments to the manuscript which significantly improved the model. In particular, we have:

- 5     1. Changed the focus from processes that affect the melt rate near the pond perimeter to processes that depend on height above sea level. For this reason, we have removed the discussion of physical processes acting near the pond perimeter.
  2. Discussed different hypsographic curves and included a parameterization of sea ice roughness.
  3. Discussed the difference between first year ice and multiyear ice pond evolution.
- 10    Additionally, we have made many smaller modifications. Below we respond in detail to each of the reviewer's comments, and attach the revised manuscript. Thank you for your time and help improving this manuscript.

## Response to reviewer comments

Thank you for the review, your comments were extremely useful! In response to your comments, we  
15    have substantially modified our paper. In particular, we have:

1. Changed the focus from processes that affect the melt rate near the pond perimeter to height-dependent processes, thereby relaxing the restriction that new ponds cannot form.
2. Explored the effects of sea ice roughness.
3. Made a more rigorous comparison to observations, where we clearly state that observations  
20       were made on multiyear ice. We have also discussed the difference in sea level pond evolution on FYI and on MYI.

We have removed or substantially changed many parts of the paper. For this reason, some of the specific comments you made no longer apply. Since we no longer focus on the processes acting near the pond perimeter, we change the name "vertical sidewall melting" to "enhanced melting." We  
25    respond (in black) in detail to all of your comments (in blue) below.

1) Reviewer feels that the authors use of Multiyear ice dataset for comparison of a model that only tracks FYI processes is a significant problem. Authors must either change out comparison data to a FYI dataset or place clear statements throughout the text indicating the severe limitations of comparison to field observations that amount to a Frankenstein combination of FYI (e.g. Landy Hypsographic curve) and MYI (Perovich Albedos).

**Response:** Thank you for pointing this out! We have changed the “default” pond albedo from 0.4 to 0.2 to correspond to typical FYI values. When comparing our model to observations, we stated that the measurements were made on level MYI but that the ponds drained to sea level, which means that our model is appropriate. On line 380, we now write:

“Ice along the albedo line was level multiyear ice, but the ponds drained to sea level after some time which makes them amenable to our model (Perovich et. al., 2003).”

In addition, we now use a MYI topography measured along a topography profile during SHEBA. We found that ponds on multiyear ice grow almost entirely due to enhanced melting.

2) Reviewer feels the authors miss a substantial opportunity to comment on the impact that differing hypsographic curves would have on the ice. Reviewer suggests that vertical sidewall melting would be primarily controlled by height above sea level of the area.

**Response:** This was a very useful comment as well. We added a section where we discussed the effects of sea ice roughness (section 5). We represented a hypsographic curve with a “tangent function” and varied the parameters of this function to get hypsographic curves with different shapes and roughness. We have developed a parameterization that approximately captures the effects of roughness for freeboard sinking and enhanced melting and allows us to estimate mean pond coverage after a period of time without having to run the model. We show that, on ice with low roughness relative to the mean freeboard height, pond growth by freeboard sinking is suppressed while pond growth by enhanced melting is permitted (with lateral melting likely playing an important role). We discuss the difference between FYI and MYI pond evolution. On line 530, we write

“Multiyear ice topography shown in Fig. 2a, dashed line, has  $\hat{\sigma} \approx 0.25$  and is significantly smoother than first year ice topography shown in Fig. 2a, solid line, which has  $\hat{\sigma} \approx 0.55$ . From Eq. (28) it follows that freeboard sinking on multiyear ice is roughly 5 times less efficient in growing the ponds than on first year ice.”

3) The conclusion of 1.3 percent per month in a warming climate is way to shaky to be allowed in the abstract or conclusion as a strong take home point. There are numerous processes not accounted for here. Trumpeting a pond coverage trend in a warming climate based only on an idealized model of one of several pond formation processes is just too bold to pass peer review. Authors have two options on this point. 1. Produce and include estimates of uncertainty with this number, 2. Drop the specific quantification and discuss the sign of the change.

**Response:** We have removed the exact number of 1.3% per month per  $\text{Wm}^{-2}$  from the abstract and the conclusion, but stated that ice thinning due pond feedback is likely of a similar order of magnitude as ice thinning due to direct forcing. In the abstract, on line 15, we write:

65 *“We also show that under a global warming scenario, pond coverage would increase, decreasing the overall ice albedo, and leading to ice thinning that is likely comparable to thinning due to direct forcing.”*

In the conclusions, on line 819, we write:

*“Under a global warming scenario, the pond feedback could lead to ice thinning comparable to thinning due to direct forcing.”*

70 4) Conclusions need to do a better job clarifying over what conditions the general interactions between melt location and pond coverage apply. Reviewer feels the model results only show how these are true for certain pond coverage and ice thickness pathways, dependent on the key initial assumptions, such as that ice all has the same hypsographic curve. As an example the conclusion that bottom melting’s impact on growth rate increases with increasing pond coverage may not hold  
75 if comparing two floes with very different pond coverage and different topography. One floe may have very flat ice and low pond coverage at the time ponds drain to sea level, while another may have higher pond coverage and greater topography. Bottom melt will impact the level ice floe more than the rougher flow because of having more ice near sea level to flood, regardless of the initial pond coverage.

80 **Response:** We feel that some confusion may have arisen from discussing the dependence of different modes of growth on pond coverage. For this reason, we removed this from the conclusions. We decided against stating many caveats in the conclusions as we believe it would derail the reader from the main findings of our model. Nevertheless, we have rewritten the conclusion section, hopefully in a clearer way.

85 5) Clarify that this is all about FY ice. . . As the melt season progresses FIRST YEAR sea ice (delete floes) in the Arctic often become(S) permeable...

**Response:** Our model can be used whenever ponds are drained to sea level, regardless of whether this is on FYI or MYI. As we discuss the evolution of drained ponds on MYI later in the paper, we did not state that the model is only about FYI in the abstract. We deleted the word “floes.”

90 6) Clarify that it is the surface relation to sea level that is of concern . . .and correspond to regions of the sea ice WHOSE SURFACE IS (delete that are) below sea level. . .

**Response:** Done

7) “relatively well” - relative to what? Can you replace this with a quantitative statement rather than this highly subjective one.

95 **Response:** We deleted “relatively” in the abstract. Later in the text gave a quantitative assessment. On line 403, we now write

*“The agreement between model and observation is excellent, with a maximum discrepancy of 3% pond coverage at the end of the melt season.”*

8) Suggest replacing “demonstrates the somewhat surprising result” with simply “indicates”. I’m not surprised by this! Also see comments later about some issues with the support for this statement.

**Response:** Done!

9) “Performing a similar. . . 1.3%... per month.” This statement is too sketchy for the abstract. This quantitative conclusion is not something that a reader could use as a takeaway number from this paper. Reviewer could permit discussion of the <sign> of this impact here, but if the authors would like to quantify it specifically outside the context of the section where this comes from in the discussion, then error bars will need to be included. Reviewer expects these would be very large and challenging to quantify.

**Response:** We removed 1.3% per  $\text{Wm}^{-2}$  per month, and instead write (line 15):

*“We also show that under a global warming scenario, pond coverage would increase, decreasing the overall ice albedo, and leading to ice thinning that is likely comparable to thinning due to direct forcing.”*

10) “Typical. . . proceeds in (delete a) fairly consistent STAGES (delete manner).” The stages are predictable, and regular. Their duration is not.

**Response:** Done

11) You can actually be clearer here. The stage when ice. . . is typically the longest, OFTEN LONGER THAN THE TWO FIRST STAGES COMBINED.

**Response:** Done

12) “we analyze the model RESULTS analytically” (I think its more the results than the model you analyze)

**Response:** We disagree: we analyze both the model equations and the solutions to those equations.

13) “. . . and (delete all the meltwater created is) MELTWATER CAN BE.” Need to be clear here that meltwater is not necessarily all removed, just that it can be removed.

**Response:** Done

14) “. . .when (delete: pond coverage drops to its summer minimum, meaning that all) the meltwater on the ice. . . ” It is not necessarily true that the coverage is at its minimum at this point, though it is likely. Better to just leave this point defined by water level and sea level relationship as the remainder of the sentence does

**Response:** Done

15) “. . .which were above sea level to sink OR MELT below sea level”. . . You allow for vertical melt to cause creation of below sea level surface.

**Response:** Done

16) “. . . at the surface of the ice”. Need to clarify that this is at EITHER surface, top or bottom. Suggest “. . . at the surface or bottom of the ice” for clarity.

**Response:** Done

135 17) “ we will further assume. . . ” You do not follow this. New ponds can form by flooding isolated areas by freeboard loss based on your use of the hypsographic curve. This clarifying constraint applies only to your vertical melt enhancement around pond perimeters. If you were to change the vertical melt enhancement to be based on surface height above freeboard, which is probably its strongest dependence, you could remove this weakness altogether and freely permit new ponds to  
140 form in low topography areas by both freeboard loss and accelerated vertical melt. Reviewr strongly suggests you consider doing this - it will make your model much more robust.

**Response:** We followed up on this. Instead of focusing on melt near the perimeter, we introduced a height-dependent enhanced melting, thereby removing the constraint on new pond formation. This required that the strength of enhanced melting be modified, and changed the scaling of enhanced  
145 melting with physical parameters. In order to derive the strength of enhanced melting, we needed to construct an additional model which we now describe in appendix B.

18) “. . . when the ice at that point melts AT THE SURFACE” - must clarify that this is only surface melt impacted.

**Response:** Done

150 19) “. . . but up to its flexural wavelength. . . ” please provide order of magnitude estimate of this and compare to melt pond size (e.g. 10 m) to show whether this assumption is supported.

**Response:** On line 109, we now write:

“An ice floe is not a rigid body, but up to its flexural wavelength (roughly 30m on 1.5m thick ice) we can approximate it as such. As the flexural wavelength is larger than the typical scale of melt  
155 ponds (roughly 10m), rigid body approximation is likely good.”

20) “. . . ponds can grow OR SHRINK as a result of freeboard CHANGES (delete sinking).” The freeboard changes work both ways, under certain circumstances. “Both rigid. . . and local. . . contribute to. . . sinking” This is inaccurate. Mass loss above sea level (local melting) contributes to freeboard rising in a relative sense.

160 **Response:** This is not true. We make a distinction between “freeboard sinking” and “rigid body motion.” What the reviewer is describing here is actually rigid body motion which can be both upward and downward depending on whether mass is lost above or below sea level. Freeboard sinking, however, represents the average downward shift of the ice surface (the surface has to move downward on average, since the ice is thinning). It has a contribution from both the rigid body motion and  
165 the average local melt. Therefore, melting bare ice will induce an upward rigid body motion and a downward local melt resulting in a downward shift of the ice surface on average. In order to clarify this, we added on line 117:

“Freeboard sinking should not be confused with rigid body motion: the average freeboard height always decreases as a response to ice thinning, whereas the rigid body motion can point both upward

170 *and downward depending on whether mass is lost above or below sea level. Both rigid body motion and average local melting contribute to freeboard sinking.”*

We also added a figure that explains our model (Figure 3).

21) “assume no new ponds can form” You should clarify that this assumption only applies to this mode of growth and not to freeboard sinking as parameterized. As stated above strongly suggest  
175 making vertical sidewall melting actually based on a reduced albedo as a function of freeboard, which removes the need for this constraint altogether.

**Response:** Now we allow for new pond formation, so we removed this sentence entirely.

22) “. . .not the horizontal EROSION (delete motion)”

**Response:** We removed this sentence from the paper.

180 23) “i) it is LIKELY near sea level”

**Response:** We removed this sentence from the paper.

24) “. . . pond perimeter melts slowly (delete enough) RELATIVE TO THAT FURTHER FROM THE PERIMETER” the rate is relative, not absolute and this wording was too qualitative anyhow.

**Response:** We removed this sentence from the paper.

185 25) How is mass above sea level determined? You have only height above sea level in the Hypsographic curve. You must use a density here as well. What is this density? (it should be lower than the density of ice below sea level)

**Response:** We made a distinction between pure ice density ( $\rho_i$ ) and bulk ice density ( $\rho_b$ ) in the text. The density used to determine the mass above sea level is the density of pure ice,  $\rho_i =$   
190  $916 \text{ kgm}^{-3}$ . On line 168, we now write:

*“ $\rho_b$  is the bulk ice density. This is the density of sea ice once all the brine has drained and is always less than  $\rho_i$ .”*

We assumed a uniform bulk ice density, and discussed the effects of vertical variations in bulk density together with the effects of internal melt in section 7.2 and appendix D.

195 26) This parameterization entirely neglects light transmission, and assumes all the change in albedo is seen by the surface. In actuality much of the difference in energy ends up being in short wavelengths deposited deeper in the ice. This would be a substantial extra complication. Reviewer would be OK if you address this simply by acknowledging that the assumption all extra energy of a lower albedo is not actually deposited at the surface and that this is a first order approximation.

200 **Response:** On line 172, we now write:

*“This parameterization neglects light transmission, and assumes that all of the energy is deposited in the surface. Much of the variation in albedo of ponded ice is due to the fact that the pond bottom is partially transparent, and energy is deposited in the ocean instead of directly in the ice. However, this does not make much difference in our model since the energy deposited in the ocean is likely  
205 used for melting ice below sea level anyway.”*

27) “. . . contribute to pond (delete growth) AREA CHANGE. (delete Since we assume new ponds cannot form)” This constraint only applies to vertical sidewall melting, not to freeboard loss.

**Response:** We removed this sentence from the paper.

210 28) “needs to equal one” This means that bare ice far away from the ponds must be greater than one if ice near ponds is less than one. The discussion here of some area being less than one, the rest = 1, and the overall average = 1 is not really sensible for any reasonably finite area. The reviewer feels the low albedo area subject to vertical sidewall melting is actually finite and of several to tens of percent of the surface. Therefore some adjustments are needed to this.

**Response:** Although it is true that it impossible some part of the ice to have  $k < 1$ , the rest to have  $k = 1$ , and  $\langle k \rangle = 1$ , it is approximately true if the fraction of ice with  $k < 1$  is small. Making this distinction would likely add little to the model, but would significantly complicate it. For this reason, we decided against changing this assumption. We write on line 292:

220 *“We note that the assumption that  $k(\mathbf{r}) = 1$  high above the sea level and  $k(\mathbf{r}) > 1$  near the sea level is strictly not true since averaged over all of bare ice  $k(\mathbf{r})$  needs to equal one. However, it is approximately true if  $\Delta s$  or  $\delta$  are small, such that the area where  $k(\mathbf{r}) \neq 1$  is small compared to the total area of bare ice.”*

29) You clarify this below on line 228, but suggest including here. . . “the average freeboard height OF THE BARE ICE FRACTION, h”

**Response:** Done

225 30) “not important” This is only true so long s ponds GROW and  $k > 1$ . Need to add some clarification of this.

**Response:** On line 226, we now write:

*“The topography below sea level is not important for the evolution of pond coverage if the pond coverage grows, ...”*

230 31) “we believe that such a statistical description. . . should be general. . . across different ice types. . . , however” This statement is not supportable. At a minimum it must be deleted.

**Response:** We deleted this sentence. Instead, we used a “tangent function” to fit the hypsographic curve. The function has two free parameters that determine its exact shape, and we were able to fit all of several measured hypsographic curves with it. On line 221, we now write:

235 *“The above sea level part of every measured hypsographic curve we tested can be fit relatively well with a tangent function (Fig. 2a, red line). We will assume that this fit holds for a wide range of different sea ice floes, and use it to initialize our model with different physical parameters.”*

240 32) Reviewer thinks that the authors are sweeping what may be the single most important control over this process under the rug. Reviewer respects that authors many not want to tackle this now and leaves the option to authors as to whether to address the possibility of different hypsographic curves having impacts. Reviewer feels changing hypsographic curves would exert considerable influence over how ponds evolve late in the melt season as well as their overall coverage. Using this

model to comment on this would be a very powerful expansion of this paper. Also, Hypsographic curves evolve during the melt season with ponded and unponded ice increasingly creating a bimodal  
245 distribution. This would change the relative impacts of the growth mechanisms. . . vertical sidewall growth may “run out” of area to impact, for example. Since reviewer has revealed their identity to assist with review completion, reviewer is available to discuss this idea if authors choose to pursue it.

**Response:** Thank you for this comment, and for helpful discussions over the phone. We took your  
250 advice and committed a section to examining the effects of the hypsographic curve shape (section 5). We defined the non-dimensional bare ice roughness,  $\hat{\sigma} \equiv \frac{\sigma}{h}$ , as the standard deviation of the bare ice height above sea level to mean freeboard height, and showed that ponds grow slower on ice with lower  $\hat{\sigma}$ . We also showed that freeboard sinking gets suppressed if the roughness is low, while enhanced melting does not. In this way, we showed that ponds on MYI grow mainly due to enhanced  
255 or lateral melting. We also developed a parameterization to estimate the mean pond coverage after a period of time if  $\hat{\sigma}$  is known.

33) “. . . only changes close to the pond boundary. . .” Actually this isn’t quite true. Changes near the pond boundary will also impact overall freeboard, resulting in an average reduction of hypsographic curve height across all heights.

260 **Response:** We removed this sentence from the paper.

34) “. . . pond perimeter. . . is a function of pond fraction” Hmm. This is not the primary control. See Melt pond fractal dimension paper that came out of Ken Golden’s group. If authors switch to treating vertical sidewall melting to be based on freeboard level as suggested above authors could avoid dealing with the significant complications in the relationship between pond area and perimeter.

265 **Response:** We do not deal with “vertical sidewall melting” anymore.

35) “decreases as the ponds deepen”. This is only true by correlation, not causation. More accurately albedo decreases as the thickness of the underlying ice decreases (also as any snow ice on the surface is removed). There are substantial issues with the next sentence. “We assume. . .” The difference in albedo of ponds caused by differences in radiative absorption in the water is  
270 negligible compared to the impact of pond bottom albedo caused by changing ice thickness. This incorrect parameterization of pond albedo calls into question your conclusion about the small effect of pond albedo on pond evolution. Reviewer believes its likely this small effect will remain, but this parameterization of pond albedo is not supportable and must be revised.

**Response:** Thank you for this comment. We now use a parameterization of pond albedo with  
275 depth developed by Morassutti and Ledrew (1996). It turns out there is even less dependence on pond depth now, since, according to their parameterization, the albedo becomes independent of depth when ponds become deep enough. The initial pond depth we use (15cm) is already close to this saturation depth, making the pond evolution independent on pond albedo variations.



36) Reviewer has some concerns about the use of this data, which is from multiyear ice, for a model exercise which is really only valid on FYI, where permeability becomes very large (MY ice ponds do not all drain to sea level). These ponds were not all permeable at the time they are discussed. The albedos here are high for first year ice and melt rates are low for FYI. In a way, the authors have created a sort of Frankenstein ice by combining FYI topography from Landy and MYI optical properties from Perovich. Would it be possible to do better using data from Polashenski et al 2012, Polashenski and Perovich 2012; and Landy et al 2014? There may also be some useful data from some of Marcel Nicolaus's papers.

**Response:** We now use a default pond albedo of 0.2 and bare ice albedo of 0.55.

37) Suggest using Timco et al '96 to refine these densities. Seawater should be more like 1025 kg/m<sup>3</sup> and sea ice more like 920 kg/m<sup>3</sup> below sea level and 0.87 above (or lower if surface scattering layer is included).

**Response:** We corrected the model to include a uniform bulk ice density different than the density of pure ice. The density of interest is the bulk ice density once all the brine has drained from the ice. For this reason it is always less than the density of pure ice. Many of the values in Timco et al suggest a large difference in bulk density above and below sea level, but this is largely due to ice below sea level being saturated with water. Once all the brine drains, the difference between ice above and below sea level is significantly less. Nevertheless, we discuss the potential effects of vertical variations in bulk density in section 7.2. We find that, if considered together with internal melt, the vertical structure of bulk ice density can likely be neglected.

38) "grows ponds. . . melting, and freeboard sinking" Not true. The melting of bare ice grows ponds through vertical sidewall melting but SHRINKS ponds through freeboard rising.

**Response:** This is not true. Freeboard (the average surface height) always sinks if the ice melts and there is no internal melting. Bare ice melting contributes to freeboard sinking since it removes a layer of the the ice surface (this is what we call "local melting") in addition to inducing and upward "rigid body motion." On average, local melting is stronger than rigid body motion if there is no internal melt.

39) Delete ". . . whereas freeboard sinking due to bare ice melting is independent of pond fraction" This is not accurate. The amount of freeboard sinking depends on how much area bare ice melting has to impact, which is dependent on pond fraction.

**Response:** We changed this to (line 461)

310 *"Furthermore, when pond coverage is low, rigid body motion due to ponded ice melting is less efficient than that due to bare ice melting because it is proportional to melt pond fraction."*

40) Might state why shrinking ponds can't be represented well. Unrealistic pond bottom topography in hypsographic curve.

**Response:** The reason shrinking ponds cannot be represented well is that the equation for enhanced melting fails in that case. On line 473, we now write:

*“The evolution of such a pond coverage cannot be represented well in our model since the equation for enhanced melting becomes invalid in this case.”*

41) ice thickness of 2 m is very thick FYI. These experiments would be better run on 1.5 m thick ice as a more typical FYI cover.

320 **Response:** We now use a default ice thickness of 1.5m.

42) Delete “in”

**Response:** We removed this sentence from the paper.

43) extra comma

**Response:** We removed this sentence from the paper.

325 44) . . . be ignored, AS LONG AS THE HYPISOGRAPHIC CURVE INCLUDES SIGNIFICANT LOW TOPOGRAPHY AREAS

**Response:** A conclusion that the complicated physics of lateral melting can be ignored does not depend on our choice of a hypsographic curve. We showed here that the lateral melt flux,  $F_{lat}$ , that is in general difficult to find, can be related with a single constant to a bare ice melting flux,  $F_{bi}$ , which is easily found using shortwave, longwave, sensible, and latent heat fluxes. In the new version of the paper we found that a slightly better agreement with Skyllingstad et. al. (2009) is made by relating  $F_{lat}$  with the ponded ice melting flux,  $F_{mp}$ . We have reorganized the discussion on lateral melting, hopefully making it more clear.

45) pond growth (ADD COMMA)

335 **Response:** We removed this sentence from the paper.

46) . . . this is Multiyear ice. SHEBA ponds are not first year ice, nor were they all permeable during the times the authors use for comparison. This poses considerable issues for this comparison. Suggest finding a FYI comparison in literature. If not, authors must acknowledge specifically and clearly that this is MYI, and not the same as what the model is set up for (FYI).

340 **Response:** Thank you for pointing this out. We were not able to find adequate FYI data, so we used the same data. Although these ponds were on MYI, at some point they drained to sea level (Perovich et al 2003), after which our model is applicable. Even if they were not completely drained at the time beginning of our comparison, this does not seem to have affected pond evolution significantly as there is a roughly constant pond coverage trend throughout the comparison period. We now write on line 380:

*“Ice along the albedo line was level multiyear ice, but the ponds drained to sea level after some time which makes them amenable to our model (Perovich et. al., 2003).”*

350 47) This is all pretty optimistic. There is likely a significant disagreement between the hypsographic curve used by the authors and that of this MY ice. Must definitely state the possibility of such given the Frankenstein nature of this dataset. Also “ This difference in topography could explain the remaining discrepancy. . .” Yes, but its unlikely that it would completely explain it and

many other factors are at play. Change to “This difference in topography could contribute to the remaining. . .”

**Response:** In section 3, we now make a more careful comparison with the observations. We show  
355 that the pond coverage trend along a nearby topography line is very similar to the albedo line, so  
we decided to use the hypsographic curve and ice thickness measured along the topography line to  
initialize our model. We treated the strength of enhanced melting as a fitting parameter. We obtained  
a better fit than before, with a discrepancy in pond coverage at the end of melt season of around 3%  
as opposed to 7%, which we had before. Also we showed that pond growth is almost entirely due to  
360 enhanced melting, and we attributed this to strong lateral melting.

48) add clarification. . . this is not a universal property of ice thickness, since changes in topog-  
raphy that may be related to ice thickness could impact. “ meaning that. . . on thicker ice OF THE  
SAME SURFACE HYPISOGRAPHIC CURVE.”

**Response:** We now write on line 614:

365 “*meaning that, all else equal, ponds grow proportionally slower on thicker ice.*”

49) “Using . . . we get. . .” This is also only true at a specific ice thickness and hypsographic curve.  
These should be specified as well to clarify that this is not a general result for all ice at this bottom  
melt flux.

**Response:** We now write on line 646

370 “*Using  $\bar{F}_{bot} = 20 \text{ Wm}^{-2}$  and other parameters same as above, we get.*”

50) “ contributes to roughly. . . both to. . . melting to. . .” Multiple split infinitive. . . way hard to  
read.

**Response:** We now write on line 689

375 “*Using the above values of strengths, we find that after a month of growth bare ice melting con-  
tributes to roughly 25% of mean pond coverage, ponded ice melting contributes to around 13%, ice  
bottom melting contributes to around 7%, and enhanced melting contributes to roughly 55%.*”

51) here is a great example of where the relative impact stated would be highly dependent on  
Hypsographic curve. In this particular case, it would seem also that vertical sidewall melting appears  
to be unimportant, the freeboard mechanism dominates. This additional sentence trying to justify  
380 vertical sidewall melting importance seems poorly supported. Reviewer thinks that vertical sidewall  
melting importance in some part of the regime would be clarified by use of differing hypsographic  
curves.

**Response:** We removed this sentence from the text. Interestingly, however, it turns out that in-  
cluding a height-dependence instead of distance from the pond edge and quantifying the effects of  
385 ice roughness makes enhanced melting important. It contributes roughly the same to mean pond  
coverage as freeboard sinking on FYI and dominates on MYI.

52) this is an accurate conclusion and likely will stand after the revision, but for right now it is  
built on a very poor pond albedo parameterization which should be revised.

**Response:** We revised the albedo parameterization, ice thickness, and enhanced melting, but  
390 found that bare ice albedo is still contributes roughly 5 times more than pond albedo if the initial  
pond coverage is the same ( $x_i = 0.2$ ).

53) This is an interesting model exercise. Reviewer will allow it here. The quantitative result,  
however, cannot be discussed outside this section (i.e. abstract and conclusion) unless the authors  
are able to produce reasonable estimates of the uncertainty. Reviewer feels the result is simply too  
395 sketchy for placing it in these areas without error estimates and risking a member of the modeling  
community pick it up as fact. Reviewer instead suggest discussion what sign these results indicate  
the melt pond change should have in a changing climate and highlighting this in the abstract and  
conclusion.

**Response:** We removed the specific number from the abstract and the conclusions, and now only  
400 state that the pond albedo feedback is important and its contribution to ice thinning is likely of a  
similar order of magnitude as contribution from direct forcing.

54) Start of section 5.1 is a non-sequitur from previous section, suggest a couple sentences to  
introduce why you are talking about this.

**Response:** We removed this section from the paper entirely.

405 55) Section 5.1 is problematic in topic based on conclusions. Reviewer thinks it would be more  
relevant after treatment of differing hypsographic curves shows that sometimes vertical sidewall  
melt is important. Based on current results, which show dominance of freeboard loss. it struck the  
reviewer as disingenuous to discuss all these mechanisms and then admit at the end that the available  
evidence suggests none are important, only as an aside in the last sentence of the section. The dis-  
410 cussion should focus on these rather than relict bits from prior version. An analysis of sensitivity to  
ice topography/roughness/hypsographic curve would be very highly valuable to the community here  
instead. The summary of the mechanisms from literature has some serious issues (detailed below).  
Authors are likely missing the strongest mechanism here as well. Albedo is strongly dependent on  
freeboard below about 20cm. . . therefore low topographic height areas will have lower albedo and  
415 will melt faster.

**Response:** We agree, and we removed this section entirely. We only briefly discuss the depen-  
dence of albedo on height above sea level. On line 264, we now write:

*“There are multiple physical processes that can cause the melt rate to deviate from the mean. One  
process that stands out as being particularly important is albedo decrease due to ice wetting: ice  
420 close to sea level will likely be wet and therefore have a lower albedo compared to ice higher up. The  
deviation from the mean melt rate in this case depends primarily on the height above sea level. An-  
other potential contribution to height- dependent enhanced melt may effectively come from random  
fluctuations in the melt rate around the average: ice near the sea level has a higher probability of  
falling below sea level due to random fluctuations than ice higher up. After falling below sea level,  
425 ice becomes ponded, melts faster, and is unable to return to its previous position.”*

56) It is important to note that lateral melt does not depend on ice thickness. . . or . . . IN THIS MODEL, THOUGH IT MAY DEPEND ON THESE IN NATURE TO SOME DEGREE.

**Response:** Done

430 57) C is the likely and observationally supported cause here. See estimates of porosity in Polashenski et al., 2012. Suggest highlighting this option as more likely than the others.

**Response:** We removed this sentence from the text. We significantly revised this section to consider the effects of vertical density structure together with internal melt. We found that these effects likely cancel each other out to a significant degree.

435 58) through section 5.4 This section is fine, but would be stronger if it included discussion of how changes in topography (hypsographic curve) would impact pond growth. In this case, the stop growing case is dependent on very steep/vertical sidewalls which are common in rough ice

**Response:** We shortened the discussion about pond growth stopping, as the paper was getting too long. Now we only mention the possibility of pond growth stopping due to upward rigid body motion temporarily induced by internal melting. On line 780, we now write:

440 *“Here, we will entertain the possibility of pond growth by vertical motion of the topography stopping entirely for a period of time. This is an example of a possible transient effect of internal melting, which, although interesting, seems unlikely.”*

Other mechanisms for slowing down pond growth, such as steep topography, are now discussed in sections 3 and 5.

445 59) “ we also find. . . ” this statement is true but authors need to fix up the pond albedo parameterization and make sure it holds

**Response:** We fixed the pond parameterization, and found a similar result.

60) “Using the same.. ” delete sentence, add error bars, or change to discussion of sign only

**Response:** We removed the exact number, and wrote only (line 819)

450 *“Under a global warming scenario, the pond feedback could lead to ice thinning comparable to thinning due to direct forcing.”*

61) “ The four modes. . . ” This statement needs qualification to prevent over interpretation or mis interpretation, specifically indicating what terms (average initial pond coverage/thickness etc) are being held constant and which are changing. The next comment will help clarify the issue.

# A simple model for the evolution of melt pond coverage on permeable Arctic sea ice

Predrag Popović<sup>1</sup> and Dorian S. Abbot<sup>1</sup>

<sup>1</sup>Department of Geophysical sciences, University of Chicago, Hinds Geophysical Sciences, 5734 S. Ellis Ave., Chicago, IL 60637

*Correspondence to:* Predrag Popović (ppopovic@uchicago.edu)

## **Abstract.**

As the melt season progresses, sea ice in the Arctic often becomes permeable enough to allow for nearly complete drainage of meltwater that has collected on the ice surface. Melt ponds that remain after drainage are hydraulically connected to the ocean and correspond to regions of sea ice whose surface is below sea level. We present a simple model for the evolution of melt pond coverage on such permeable sea ice floes in which we allow for spatially varying ice melt rates and assume the whole floe is in hydrostatic balance. The model is represented by two simple ordinary differential equations, where the rate of change of pond coverage depends on the pond coverage. All the physical parameters of the system are summarized by four strengths that control the relative importance of the terms in the equations. The model both fits observations and allows us to understand the behavior of melt ponds in a way that is often not possible with more complex models. Examples of insights we can gain from the model are: (1) the pond growth rate is more sensitive to changes in bare sea ice albedo than changes in pond albedo, (2) ponds grow slower on smoother ice, and (3) ponds respond strongest to freeboard sinking on first year ice and sidewall melting on multiyear ice. We also show that under a global warming scenario, pond coverage would increase, decreasing the overall ice albedo, and leading to ice thinning that is likely comparable to thinning due to direct forcing. Since melt pond coverage is one of the key parameters controlling the albedo of sea ice, understanding the mechanisms that control the distribution of pond coverage will help improve large-scale model parameterizations and sea ice forecasts in a warming climate.

## **20 1 Introduction**

Over the past forty years, Arctic summer sea ice extent has reduced by 50 percent, making it one of the most sensitive indicators of man-made climate change (Serreze and Stroeve, 2015; Stroeve et. al., 2007; Perovich and Richter-Menge, 2009). This rapid decrease is at least partially due to the ice-albedo feedback (Zhang et. al., 2008; Screen and Simmonds, 2010; Perovich et. al., 2007). Moreover, if the ice-albedo feedback is strong enough it could lead to instabilities and abrupt changes in ice coverage in the future (North, 1984; Holland et. al., 2006; Eisenman and Wettlaufer, 2008; Abbot et al., 2011). The albedo of ice is significantly reduced by the presence of melt ponds on

its surface (Eicken et. al., 2004; Perovich and Polashenski, 2012; Yackel et. al., 2000). Therefore, understanding the evolution of melt ponds is essential for understanding the ice-albedo feedback, and consequently, the evolution of Arctic sea ice cover in a warming world. This means that accurate melt pond parameterizations must be incorporated into Global Climate Models (GCMs) to improve their sea ice forecasts (Flocco et. al., 2010; Holland et. al., 2012; Pedersen et. al., 2009). The main difficulties with including accurate melt pond parameterizations in large scale models are that pond evolution is nonlinear and that it is the result of a variety of different physical processes operating on a range of length and time scales. For these reasons, it is important to understand the mechanisms that drive the evolution of melt ponds.

Typically, the evolution of pond coverage on first-year ice proceeds in fairly consistent stages (Polashenski et. al., 2012; Perovich et. al., 2003; Landy et. al., 2014; Webster et. al., 2015). First the ponds grow quickly while the ice is impermeable. Next they drain quickly and pond coverage shrinks as the ice transitions from impermeable to permeable. Then the ponds grow slowly while the ice is permeable and pond water remains at sea level. Finally, the ponds either refreeze or the floe breaks up. The stage when ice is highly permeable is typically the longest, often longer than the first two stages combined. This stage is particularly suitable to model, since the ponds can be assumed to be at sea level and hydraulically connected to the ocean. On multiyear ice, ponds also experience a growth and a drainage stage, but often do not drain to sea level. On some occasions, however, ponds on multiyear ice can drain to sea level as well.

In this paper we will present a simple “0D” model for the evolution of melt pond coverage on sea ice floes. We will assume that ice is permeable, ponds are at sea level and hydraulically connected to the ocean, the whole ice floe is in hydrostatic balance, and different points on the ice surface may melt at different rates. The purpose of our model is: (1) to clarify the roles in the evolution of pond coverage played by energy fluxes, the ice thickness, bulk ice density, ice roughness, and initial pond coverage, (2) to provide a simple, yet accurate, way to estimate the pond coverage as a function of time, (3) to understand the behavior of melt ponds under general environmental conditions, and (4) to investigate different types of qualitative behavior that can arise from differential melting and maintaining hydrostatic balance.

Skyllingstad et. al. (2009) also describe pond growth on permeable ice, but include only pond growth by lateral melt of pond walls. This contrasts with our model, which includes pond growth by vertical changes of the topography. Our models are different, but complementary, and we will draw parallels between our two models when discussing the possibility of lateral melt. Aside from Skyllingstad et. al. (2009), previous melt pond modeling efforts include works by Taylor and Feltham (2004), Lüthje et. al. (2006), Scott and Feltham (2010), and Flocco and Feltham (2007), who all created comprehensive models that allowed for more realistic representations of physical processes such as heat and salt balance, and meltwater routing and drainage. The advantage of our

model is its simplicity, which makes it possible to clarify the roles of each of the physical parameters  
65 involved.

This paper is organized in the following way. In section 2 we build a simple model for the evolution  
of pond coverage. In section 3, we compare the model to observations. In section 4 we discuss  
realistic values of physical parameters and solve the model numerically. In section 5 we assess  
the impacts of sea ice roughness and develop a simple parameterization to estimate mean pond  
70 coverage after a certain amount of time without solving the model. In section 6 we analyze the model  
analytically to gain a better understanding of the factors influencing pond evolution. In section 7 we  
discuss lateral melt and internal melt combined with effect of density variations. Finally in section 8  
we summarize our results and conclude. In appendices A, B, C, and D we discuss some of the more  
technical aspects of our model.

## 75 **2 Building the simple 0D model**

In this section, we build the model for the evolution of melt pond coverage, and then solve it using  
realistic physical parameters. Before we proceed to build the quantitative model, we will first state  
the assumptions, and discuss the physical mechanisms driving pond evolution.

### **2.1 Assumptions of the model**

80 Our model focuses on the stage of pond evolution when ice is highly permeable and all the meltwater  
created can be quickly removed to the ocean. The beginning of this stage can be identified as the  
point in time when the meltwater on the ice surface has drained to sea level, such that the remaining  
ponds correspond to places on the ice surface that are below sea level. We will assume that from  
this point on, the ponds are hydraulically connected with the ocean, and the only way for pond  
85 coverage to increase is for the points on the ice surface which were above sea level to sink or melt  
below sea level. In reality, ponds can also grow through horizontal melting of their sidewalls. As  
some observations suggest that this type of growth is small at least on first year ice (Polashenski et.  
al., 2012; Landy et. al., 2014), we neglect it (see section 7.1 for further discussion). Furthermore,  
we will assume that all the melt occurs at the surface or the bottom of the ice. We thereby neglect  
90 the possibility of internal melt. We will also assume that ice has a uniform bulk density throughout  
the vertical column, and we discuss the effects of vertical non-uniformity in bulk density together  
with effects of internal melt in subsection 7.2. Finally, we will assume that the entire ice floe is in  
hydrostatic balance.

The main goal of our model is to determine the fraction of the ice surface above sea level that  
95 falls below sea level after some time. Therefore, we focus on the vertical displacements of points  
on the surface of the ice in response to melt. To this end, we define the ice topography,  $s(\mathbf{r})$ , as the  
elevation of the ice surface above sea level at the point  $\mathbf{r}$ , and we define melt ponds as those regions



where  $s(\mathbf{r}) < 0$ . There are two main reasons why the topography might change in response to ice melt:

- 100 1. First, the topography at a point  $\mathbf{r}$  at the surface changes when ice at that point melts (Fig. 1a). Here, the rate of change of topography at a point depends only on local characteristics of that particular point. For this reason, we will call this type of motion “local.” Points on the surface that melt locally move “downwards,” i.e. to lower elevations above sea level.
- 105 2. Second, in order to maintain hydrostatic balance, the entire ice surface can shift up or down in response to mass being removed above or below sea level. Since we are assuming that the entire ice floe is in hydrostatic balance, melting any region of ice moves the entire floe as a rigid body (Fig. 1b). For this reason, we will call this type of motion the “rigid body” motion. Melting above sea level induces an upward rigid body motion, whereas melting below sea level induces a downward rigid body motion. An ice floe is not a rigid body, but up to its  
110 flexural wavelength (roughly 30m on 1.5m thick ice) we can approximate it as such. As the flexural wavelength is larger than the typical scale of melt ponds (roughly 10m), the rigid body approximation is likely good.

At each point on the ice surface the change in elevation above sea level can be calculated as the sum of these two contributions.

115 In our model, ponds grow in two ways, “freeboard sinking” and “enhanced melting”:

1. Freeboard sinking represents the average change in freeboard height (average height above sea level of bare ice). In this way the topography of ice above sea level remains unchanged. Freeboard sinking should not be confused with rigid body motion: the average freeboard height always decreases as a response to ice thinning, whereas the rigid body motion can point both  
120 upward and downward depending on whether mass is lost above or below sea level. Both rigid body motion and average local melting contribute to freeboard sinking.
2. Enhanced melting represents the change in the shape of the topography without changing its average height. Ponds can grow in this way if some regions melt faster than average. Therefore, a positive deviation in the local melt rate can grow ponds. Conversely, a negative deviation in  
125 the local melt rate can slow down or even reverse pond growth. Pond growth only occurs due to topography changes near sea level. Therefore, deviations from the mean melt rate for points high above the sea level do not influence pond evolution since these points are correlated with points close to sea level only through hydrostatic adjustment, which is determined by the average melt rates rather than the deviations from the average.

## 130 2.2 Equation for the evolution of topography

We now proceed to build the quantitative model of pond evolution. Following the above ideas, we divide the total rate of change of vertical position of the point  $\mathbf{r}$  on the surface of the ice,  $\frac{ds}{dt}(\mathbf{r})$ , into

a contribution from rigid body motion,  $\frac{ds_{\text{rigid body}}}{dt}$ , and a contribution from local melting,  $\frac{ds_{\text{loc}}}{dt}(\mathbf{r})$ ,

$$\frac{ds}{dt}(\mathbf{r}) = \frac{ds_{\text{rigid body}}}{dt} + \frac{ds_{\text{loc}}}{dt}(\mathbf{r}). \quad (1)$$

135 Ice above sea level must hydrostatically balance ice below sea level. We can write this hydrostatic balance as

$$m_{\text{above s. l.}} = \frac{\rho_w - \rho_i}{\rho_i} m_{\text{below s. l.}}, \quad (2)$$

where  $m_{\text{above s. l.}}$ , and  $m_{\text{below s. l.}}$  represent the mass of ice above and below sea level, and  $\rho_w$ , and  $\rho_i$  represent the densities of sea water and pure ice. Throughout the paper we use  $\rho_w = 1025 \text{ kg m}^{-3}$   
140 and  $\rho_i = 916 \text{ kg m}^{-3}$ .

The mass above and below sea level can change either because the ice melts or because the floe moves as a rigid body, changing the proportion of ice above and below sea level. Therefore, differentiating Eq. (2) and splitting into melt and rigid body contributions, we find

$$dm_{\text{above s. l.}}^{\text{melt}} + dm_{\text{above s. l.}}^{\text{rigid body}} = \frac{\rho_w - \rho_i}{\rho_w} \left[ dm_{\text{below s. l.}}^{\text{melt}} + dm_{\text{below s. l.}}^{\text{rigid body}} \right], \quad (3)$$

145 where  $dm_{\text{above/below s. l.}}^{\text{melt/rigid body}}$  represent changes in mass above and below sea level due to either ice melting or the entire floe floating up or down.

The mass melted above and below sea level after some time  $dt$  is

$$\begin{aligned} dm_{\text{above s. l.}}^{\text{melt}} &= -A_{\text{bi}} \frac{\overline{F}_{\text{bi}}}{l} dt, \\ dm_{\text{below s. l.}}^{\text{melt}} &= -A_{\text{mp}} \frac{\overline{F}_{\text{mp}}}{l} dt - A \frac{\overline{F}_{\text{bot}}}{l} dt, \end{aligned} \quad (4)$$

where  $l = 334 \text{ kJ kg}^{-1}$  is the latent heat of melting,  $\overline{F}_{\text{bi}}$  is the total energy flux used for melting bare ice averaged over all bare ice,  $\overline{F}_{\text{mp}}$  is the total energy flux used for melting ponded ice averaged over ponded ice,  $\overline{F}_{\text{bot}}$  is the total energy flux used for melting the ice bottom averaged over the ice bottom,  $A_{\text{bi}}$ ,  $A_{\text{mp}}$ , and  $A$  are the area of bare ice, the area of melt ponds, and the area of the entire floe.

155 Since floating up or down does not change the total mass of the ice, mass changes above and below sea level due to rigid body motion are equal with an opposite sign,  $dm_{\text{above s. l.}}^{\text{rigid body}} = -dm_{\text{below s. l.}}^{\text{rigid body}}$ . We can express  $dm^{\text{rigid body}}$  in terms of rigid body displacement of the floe as

$$\begin{aligned} dm_{\text{above s. l.}}^{\text{rigid body}} &= \rho_b A_{\text{bi}} ds_{\text{rigid body}}, \\ dm_{\text{below s. l.}}^{\text{rigid body}} &= -\rho_b A_{\text{bi}} ds_{\text{rigid body}}, \end{aligned} \quad (5)$$

where  $\rho_b$  is the bulk ice density. This is the density of sea ice once all the brine has drained and is always less than  $\rho_i$ . We assume it to be uniform throughout the vertical ice column, but discuss the  
160 effects of vertical variations in  $\rho_b$  in section 7.2.

Substituting Eqs. (4) and (5) into Eq. (3), solving for  $ds_{\text{rigid body}}$ , and differentiating with respect to time, we find the rate of change of surface topography due to rigid body motion to be

$$\frac{ds_{\text{rigid body}}}{dt} = \left[ \frac{\rho_i}{\rho_w} \frac{\bar{F}_{\text{bi}}}{l\rho_b} \right] - \left[ \frac{\rho_w - \rho_i}{\rho_w} \frac{A_{\text{mp}}}{A_{\text{bi}}} \frac{\bar{F}_{\text{mp}}}{l\rho_b} \right] - \left[ \frac{\rho_w - \rho_i}{\rho_w} \frac{A}{A_{\text{bi}}} \frac{\bar{F}_{\text{bot}}}{l\rho_b} \right]. \quad (6)$$

The three terms in large square brackets correspond to topography change due to bare ice melting, ponded ice melting, and ice bottom melting. Rigid body motion depends only on spatially averaged energy fluxes, which in turn depend on parameters such as the average insolation on the floe, the average albedo, and the average longwave, sensible, latent and bottom heat fluxes. If bare and ponded ice melt only from energy absorbed by the upper surface of the ice, the fluxes  $\bar{F}_{\text{bi}}$ , and  $\bar{F}_{\text{mp}}$  can also be written in terms of albedo as:

$$\begin{aligned} \bar{F}_{\text{bi}} &= (1 - \alpha_{\text{bi}})F_{\text{sol}} + F_{\text{r}}, \\ \bar{F}_{\text{mp}} &= (1 - \alpha_{\text{mp}})F_{\text{sol}} + F_{\text{r}}, \end{aligned} \quad (7)$$

where  $\alpha_{\text{bi}}$  and  $\alpha_{\text{mp}}$  are the average albedos of bare and ponded ice,  $F_{\text{sol}}$  is the solar flux, and  $F_{\text{r}}$  is equal to the sum of net longwave, net sensible, and net latent heat fluxes. This parameterization neglects light transmission, and assumes that all of the energy is deposited in the surface. Much of the variation in albedo of ponded ice is due to the fact that the pond bottom is partially transparent, and energy is deposited in the ocean instead of directly in the ice. However, this does not make much difference in our model since the energy deposited in the ocean is likely used for melting ice below sea level anyway.

Local displacement,  $ds_{\text{loc}}$ , quantifies how much the ice surface topography changes as a result of local melt. We can determine the local melt rate from  $F_{\text{surf}}(\mathbf{r})$ , the flux of energy used for melting the ice surface at a point  $\mathbf{r}$

$$\frac{ds_{\text{loc}}}{dt}(\mathbf{r}) = -\frac{F_{\text{surf}}(\mathbf{r})}{l\rho_b}, \quad (8)$$

where the positive direction is defined as upwards. The local flux depends on parameters such as the local albedo, the local insolation, the local longwave, sensible and latent heat fluxes, and the angle between ice and incoming radiation at that point.

The flux  $F_{\text{surf}}(\mathbf{r})$  averaged over all the points on the surface of the ice above sea level equals  $\bar{F}_{\text{bi}}$

$$\langle F_{\text{surf}}(\mathbf{r}) \rangle = \bar{F}_{\text{bi}}, \quad (9)$$

where  $\langle \dots \rangle$  represents averaging over all the points on bare ice. For this reason, we will parameterize the rate of local melting as

$$\frac{ds_{\text{loc}}}{dt}(\mathbf{r}) = -k(\mathbf{r}) \frac{\bar{F}_{\text{bi}}}{l\rho_b}, \quad (10)$$

where  $k(\mathbf{r})$  is a non-dimensional number that quantifies the deviation of the melt rate at the point  $\mathbf{r}$  from the mean melt rate of the bare ice surface, which depends on the detailed conditions of ice and

its environment. The parameter  $k$  could be either greater than or less than one. Here we will take  $k$  to be constant in time, but in reality it need not be. Finally, according to Eq. (1) we add Eq. (6) and Eq. (10) to get the equation for the evolution of the bare ice topography. We express this in terms of melt pond fraction,  $x \equiv \frac{A_{\text{mp}}}{A}$

$$\begin{aligned} \frac{ds}{dt}(\mathbf{r}) = & - \left[ (k(\mathbf{r}) - 1) \frac{\bar{F}_{\text{bi}}}{l\rho_b} \right] - \\ & - \left[ \frac{\rho_w - \rho_i}{\rho_w} \frac{1}{l\rho_b} \left( \bar{F}_{\text{bi}} + \frac{x}{1-x} \bar{F}_{\text{mp}} + \frac{1}{1-x} \bar{F}_{\text{bot}} \right) \right]. \end{aligned} \quad (11)$$

Here, we split the equation into two terms, enclosed by the square brackets. The first term represents the local deviation from the average surface melt rate, which changes the general shape of the topography while preserving its average height above sea level. We identify this term with enhanced melting. The second term represents a global shift of the average elevation above sea level due to freeboard sinking.

In this way, the topographic evolution equation can be split into two terms: enhanced melting, and freeboard sinking:

$$\frac{ds}{dt} = \frac{ds_{\text{em}}}{dt} + \frac{ds_{\text{fs}}}{dt}, \quad (12)$$

where  $\frac{ds_{\text{em}}}{dt}$ , and  $\frac{ds_{\text{fs}}}{dt}$  are contributions from enhanced melting, and freeboard sinking, and correspond to the first and second term of Eq. (11).

### 2.3 Model for the evolution of pond coverage

We now need to relate the vertical displacements near the sea level to the change in area of the melt ponds. To this end we define the hypsographic curve,  $s(x_h)$ , which relates the elevation above sea level,  $s$ , to the percent of ice surface below that elevation,  $x_h$  (Fig. 2). Such curves have been measured and reported on several occasions (e.g. Fig. 8 of Eicken et. al. (2004), or Fig. 8 of Landy et. al. (2014)). If the ice is highly permeable, the melt pond fraction,  $x$ , can be inferred from a hypsographic curve as the intersection of sea level with the curve. Since ponds are hydraulically connected with the ocean, the average freeboard height of bare ice,  $h$ , depends on the pond fraction. The average freeboard height,  $h$ , can be expressed in terms of the ice thickness  $H$  and the pond fraction as

$$h = \frac{\rho_w - \rho_i}{\rho_w} \frac{H}{1-x}. \quad (13)$$

Here, the average freeboard height is defined as the elevation of the ice surface above sea level averaged over bare ice. For two ice floes of the same thickness, the one with higher pond coverage will also need to have a higher average freeboard in order to maintain hydrostatic balance.

The above sea level part of every measured hypsographic curve we tested can be fit relatively well with a tangent function (Fig. 2a, red line). We will assume that this fit holds for a wide range

of different sea ice floes, and use it to initialize our model with different physical parameters. We give the exact form of this function in appendix A (Eq. 35). To get a hypsographic curve for a particular initial pond fraction,  $x_i$ , and ice thickness,  $H$ , we set it to zero at the initial pond coverage,  $s(x_h = x_i) = 0$ , and rescale it vertically to get a freeboard that hydrostatically balances the floe. The topography below sea level is not important for the evolution of pond coverage if the pond coverage grows, and we replace it with a straight line.

We show several curves for different initial ice thickness and initial pond coverage in Fig. 2b and Fig. 2c. We note that the initial pond fraction,  $x_i$ , corresponds to the pond fraction when ice first becomes permeable. Once we choose  $x_i$  and  $H$ , the tangent function Eq. (35) has only two unconstrained parameters,  $p_1$  and  $p_2$ , that determine the exact shape of the curve. Knowing additional physical parameters, such as ice roughness, we can constrain additional parameters of this curve. Throughout this paper we will mostly use  $p_1$  and  $p_2$  that fit the measurements of the hypsographic curve made by Landy et. al. (2014) for June 25th of 2011 or the measurements made during the SHEBA mission along the topography profile “1” on July 10th 1998. However, when examining the effects of sea ice roughness, we will vary these parameters to get curves of different shape. Several examples of hypsographic with different  $p_1$  and  $p_2$  are shown in Fig. 2d.

In the case of pure freeboard sinking the overall shape of the hypsographic curve does not change as the ice melts. Instead the whole curve is shifted following a displacement of  $ds_{fs}$  (Fig. 3a). We can calculate the resulting change in pond coverage as

$$\frac{dx}{dt} = \frac{dx_h}{ds}(x) \frac{ds_{fs}}{dt}, \quad (14)$$

where  $ds_{fs}$  is the vertical displacement of the bare ice topography due to freeboard sinking (as determined by the second term in Eq. (11)), and  $\frac{dx_h}{ds}(x)$  is the change in pond fraction for a vertical shift of the ice surface of  $ds_{fs}$  when the pond fraction is equal to  $x$ . It is equal to the reciprocal of the derivative of the hypsographic curve,  $s(x_h)$ , evaluated at  $x_h = x$ . Substituting  $\frac{ds_{fs}}{dt}$  from Eq. (11) we find

$$\frac{dx}{dt} = \frac{d\hat{x}_h}{d\hat{s}}(x) \left[ S_{bi} + S_{mp} \frac{\hat{x}}{1-x} + S_{bot} \frac{1}{1-x} \right], \quad (15)$$

where  $\hat{x} \equiv \frac{x}{x_i}$ , and  $\widehat{1-x} \equiv \frac{1-x}{1-x_i}$  are the pond and bare ice fractions normalized by the initial pond and bare ice fractions,  $\frac{d\hat{x}_h}{d\hat{s}}(x) \equiv \frac{h}{1-x_i} \frac{dx_h}{ds}(x)$  is the non-dimensional slope of the hypsographic curve, and we have defined the strengths of pond growth by freeboard sinking due to melting bare, ponded, and ice bottom,  $S_{bi}$ ,  $S_{mp}$ , and  $S_{bot}$  as

$$\begin{aligned} S_{bi} &\equiv \frac{(1-x_i)^2 \bar{F}_{bi}}{Hl\rho_b}, \\ S_{mp} &\equiv \frac{(1-x_i)x_i \bar{F}_{mp}}{Hl\rho_b}, \\ S_{bot} &\equiv \frac{(1-x_i) \bar{F}_{bot}}{Hl\rho_b}. \end{aligned} \quad (16)$$

The non-dimensional factors  $\widehat{x}$ ,  $\widehat{1-x}$ , and  $\frac{d\widehat{x}_h}{d\widehat{s}}(x)$  are chosen to be of the order unity, so that  $S_{bi}$ ,  
 255  $S_{mp}$ , and  $S_{bot}$  control the strengths of pond growth by melting bare ice, melting ponded ice, and  
 melting ice bottom. The reciprocals of the strengths represent the timescales of the growth modes.

The set of parameters needed to describe pure freeboard sinking can be further reduced by rewrit-  
 ing Eq. (15) as

$$\frac{dx}{dt} = \frac{d\widehat{x}_h}{d\widehat{s}}(x) \left[ S_1 \frac{\widehat{x}}{1-x} + S_2 \frac{1}{1-x} \right], \quad (17)$$

260 where  $S_1 \equiv S_{mp} - x_i S_{bi} / (1 - x_i)$  and  $S_2 \equiv S_{bot} + S_{bi} / (1 - x_i)$  represent a minimal set of parameters  
 needed to describe pure freeboard sinking. However, these parameters do not have a clear physical  
 interpretation, and we will henceforth focus only on  $S_{bi}$ ,  $S_{mp}$ , and  $S_{bot}$ .

Next we need to consider the contribution from enhanced melting. Before doing so we need to  
 make some assumptions about the nature of enhanced melt. There are multiple physical processes  
 265 that can cause the melt rate to deviate from the mean. One process that stands out as being partic-  
 ularly important is albedo decrease due to ice wetting: ice close to sea level will likely be wet and  
 therefore have a lower albedo compared to ice higher up. The deviation from the mean melt rate in  
 this case depends primarily on the height above sea level. Another potential contribution to height-  
 dependent enhanced melt may effectively come from random fluctuations in the melt rate around  
 270 the average: ice near the sea level has a higher probability of falling below sea level due to random  
 fluctuations than ice higher up. After falling below sea level, ice becomes ponded, melts faster, and  
 is unable to return to its previous position. Other processes, such as lateral melt, may not depend on  
 height above sea level, but for now we neglect this possibility (see section 7.1 for discussion).

Because of the processes described above, we will assume that the deviation from the mean melt  
 275 rate,  $k(\mathbf{r}) - 1$ , depends only on height above sea level,  $s$ . In this scenario, we need to consider en-  
 hanced melting together with freeboard sinking, as freeboard sinking constantly supplies new ice to  
 low elevations to be affected by enhanced melting. Effects of enhanced melting and freeboard sinking  
 can be approximately separated if, instead of height-dependence, enhanced melting is constrained to  
 act on a fixed fraction of bare ice. In this case, a constant fraction of bare ice that would experience  
 280 enhanced melting would evolve, at least approximately, independently of freeboard sinking.

Therefore, we will consider two cases of enhanced melting. Firstly, we will consider a height-  
 dependent enhanced melting. In particular, we will assume that  $k(0 < s < \Delta s) \equiv k$  and  $k(s > \Delta s) \equiv$   
 1, where  $\Delta s$  is a height above which there is no enhanced melting and below which enhanced melt-  
 ing is constant  $k > 1$ . This is the case we ultimately wish to describe. We describe a potential model  
 285 for pond growth under this assumption in appendix B and Fig. 3d. However, from a practical view-  
 point, it is simpler to consider enhanced melting which acts upon a fixed fraction of bare ice. In this  
 case, we will assume that  $k(x < x_h < x + \delta) \equiv k$  and  $k(x_h > x + \delta) \equiv 1$ , where  $\delta$  is a fraction of ice  
 affected by enhanced melting (Fig. 3b). In appendix B, we show that, if  $\delta$  is appropriately chosen,  
 a height-dependent model and a fixed fraction model become equivalent. Therefore, we will first

290 solve a model assuming a fixed  $\delta$  and no freeboard sinking, and then relate it to a fixed  $\Delta s$  model by choosing the appropriate  $\delta$ .

We note that the assumption that  $k(\mathbf{r}) = 1$  high above the sea level and  $k(\mathbf{r}) > 1$  near the sea level is strictly not true since averaged over all of bare ice  $k(\mathbf{r})$  needs to equal one. However, it is approximately true if  $\Delta s$  or  $\delta$  are small, such that the area where  $k(\mathbf{r}) \neq 1$  is small compared to  
 295 the total area of bare ice. Also, we have assumed  $k(\mathbf{r}) = 1$  high above the sea level without loss of generality, since deviations from the mean melt rate high above the sea level are not important, as only ice close to sea level may become ponded.

Now we proceed to consider the case of “pure enhanced melting” that assumes a fixed fraction of the ice,  $\delta$ , melts, and there is no freeboard sinking (Fig. 3b). If there is no topographic variation above  
 300 sea level, and the entire ice floe above sea level has the same height,  $h$ , the pond coverage would grow by  $\delta$  after a time  $\Delta t = \frac{h}{ds_{em}/dt}$ , where  $ds_{em}/dt$  is the rate of change of topography due to enhanced melting as determined by the first term of Eq. (11). Therefore, the pond growth rate in this case would be  $\frac{\Delta x}{\Delta t} = \frac{\delta}{h} \frac{ds_{em}}{dt}$ . If there is non-negligible topography above sea level described by the hypsographic curve, the time  $\Delta t$  it takes for pond coverage to grow by  $\delta$ , would be  $\Delta t = \frac{s(x_h=x+\delta)}{ds_{em}/dt}$ .  
 305 Here,  $s(x_h = x + \delta)$  is the original hypsographic curve evaluated at  $x_h = x + \delta$ . We will assume this expression generally holds for enhanced melting. Thus, we arrive at the expression for pond growth due to pure enhanced melting with fixed  $\delta$

$$\frac{dx}{dt} = \frac{\delta}{s(x+\delta)} \frac{ds_{em}}{dt}. \quad (18)$$

If  $\delta$  is small compared to the variation in the hypsographic curve, we can substitute  $s(x+\delta)$  with  
 310  $s(x)$ . This is only not justified near the beginning of the melt, when  $s(x) \approx 0$ . Substituting  $\frac{ds_{em}}{dt}$  from Eq. (11) we find

$$\frac{dx}{dt} = S_{em} \frac{1}{\hat{s}(x+\delta)}, \quad (19)$$

where  $\hat{s}(x) \equiv \frac{s(x)}{h}$  is the non-dimensional hypsographic curve, and the strength of the enhanced melting,  $S_{em}$ , is defined as

$$315 \quad S_{em} \equiv \frac{\rho_w}{\rho_w - \rho_i} \frac{(1 - x_i)\delta(k-1)\overline{F}_{bi}}{Hl\rho_b}. \quad (20)$$

Ultimately, however, our goal was to describe the height-dependent enhanced melting. In appendix B, we showed that such a model can be approximated with a fixed fraction model, if we appropriately relate  $\delta$  and  $\Delta s$ . Here we simply state the result

$$\delta = \frac{\rho_w}{\rho_w - \rho_i} \frac{2\Delta s(1 - x_i)^2}{3H(1 + \frac{ds_{em}}{ds_{fs}})}. \quad (21)$$

320 Here,  $\frac{ds_{em}}{ds_{fs}}$  represents the ratio of the topographic rate of change due to enhanced melting to freeboard sinking and is given by

$$\frac{ds_{em}}{ds_{fs}} = \frac{\rho_w}{\rho_w - \rho_i} \frac{|\overline{F}_{bi}|(k-1)}{|\overline{F}_{bi}| + \frac{x_i}{1-x_i}|\overline{F}_{mp}| + \frac{1}{1-x_i}|\overline{F}_{bot}|}, \quad (22)$$

where  $|\overline{F}|$  are the representative values of energy fluxes, e.g. their time-averages. Therefore, the strength of height-dependent enhanced melting becomes

$$325 \quad S_{\text{em}} = \left( \frac{\rho_w}{\rho_w - \rho_i} \right)^2 \frac{2\Delta s(1-x_i)^3(k-1)\overline{F}_{\text{bi}}}{3H^2l\rho_b(1+\frac{ds_{\text{em}}}{ds_{\text{fs}}})}. \quad (23)$$

We have made a number of assumptions in deriving the expression for enhanced melting. Below we compare this model to a more complicated “1D” model and show that all these assumptions are justified. We also show that if the function describing the local melt rate,  $k(s)$ , has a non-trivial dependence on height above sea level, parameter  $S_{\text{em}}$  is better replaced with a parameter

$$330 \quad \langle S_{\text{em}} \rangle \equiv \left( \frac{\rho_w}{\rho_w - \rho_i} \right)^2 \frac{2(1-x_i)^3\overline{F}_{\text{bi}}}{3H^2l\rho_b} \int_0^\infty \frac{k(s)-1}{1+\frac{ds_{\text{em}}}{ds_{\text{fs}}}(s)} ds \quad (24)$$

In this way, we have separated the effects of freeboard sinking and enhanced melting. Finally, we will assume that contributions from freeboard sinking and enhanced melting can be added independently. Therefore, we solve Eq. (15) for pure freeboard sinking, and Eq. (19) for enhanced melting independently, and add them together to get the full evolution of pond coverage,  $x(t)$ :

$$335 \quad x(t) = x_{\text{fs}}(t) + x_{\text{em}}(t) - x_i, \quad (25)$$

where  $x_{\text{fs}}(t)$ , and  $x_{\text{em}}(t)$  are solutions to Eq. (15), and Eq. (19), both forced using the same parameters, and initialized with the same initial pond fraction  $x_i$ . This concludes the 0D model.

Equation (25) represents a sum of solutions to two simple ordinary differential equations, in which the rate of change of pond fraction depends on the pond fraction. Here, we have reduced the number of parameters from the original ten ( $H$ ,  $x_i$ ,  $\rho_b$ ,  $\overline{F}_{\text{bot}}$ ,  $F_{\text{sol}}$ ,  $F_{\text{r}}$ ,  $\alpha_{\text{bi}}$ ,  $\alpha_{\text{mp}}$ ,  $k$ , and  $\Delta s$ ) to four ( $S_{\text{bi}}$ ,  $S_{\text{mp}}$ ,  $S_{\text{bot}}$ , and  $S_{\text{em}}$ ). The strengths of freeboard sinking,  $S_{\text{bi}}$ ,  $S_{\text{mp}}$ , and  $S_{\text{bot}}$ , depend only on the parameters that are available in GCM simulations, and are relatively easily measured in observational studies. The enhanced melting strength,  $S_{\text{em}}$ , however, also depends on the difficult-to-measure parameters  $k$  and  $\Delta s$  that describe the melt rate near the sea level, and may also have contributions from processes that are not height dependent. Furthermore, as we discuss below, ice roughness can also play an important role in pond evolution. With reliable constraints on these parameters, our model would be a useful parameterization in GCMs for pond growth after ice becomes permeable.

## 2.4 Testing the model

In order to test the assumptions we made to simplify the model, we have developed a “1D” model in which we explicitly determine pond evolution when both freeboard sinking and enhanced melting are happening simultaneously. Apart from resolving the melt rates in one dimension, the underlying assumptions for the 1D model are essentially the same as for the simple model. For this reason, we simply give an outline for this model, without discussing it in much detail.

In the 1D model, we evolve the hypsographic curve by prescribing a melt rate,  $ds_{\text{loc}}$ , to each point on the hypsographic curve depending on the height above sea level (Fig. 3c). The hypsographic curve



high above sea level melts at a uniform rate, whereas the hypsographic curve slightly above sea level melts at an enhanced rate. Parts of the curve below sea level melt at a uniform rate determined by the flux used for melting ponded ice,  $\bar{F}_{mp}$ . Finally, hydrostatic adjustment is calculated by finding the ice thickness directly at each time step, and placing the floe in hydrostatic balance. The evolution of pond coverage obtained from this model is shown in Fig. 4a. The comparison with the simple 0D model is excellent.

The 1D model allows us some freedom to test the detailed assumptions of the 0D model. First, we can test how the functional form of  $k(s)$  affects the pond evolution (Fig. 4b). The functions  $k(s)$  were chosen such that they all have the same integral parameter  $\langle S_{em} \rangle$  defined in Eq. (24). Figure 4a shows that in each of these cases the evolution of pond coverage proceeds nearly identically. Second, we can test the difference between an assumption that enhanced melting acts below a constant height  $\Delta s$  and an assumption that enhanced melting acts on a constant fraction of ice,  $\delta$ . The yellow line in Fig. 4a shows that if  $\delta$  and  $\Delta s$  are chosen according to Eq. (21), both assumptions yield very similar results. Finally, we can test the effects of varying pond albedo. In reality pond albedo decreases as the ponds deepen. We assume a dependence of pond albedo on pond depth reported in Table VII of Morassutti and Ledrew (1996) for mean broadband albedo. The magenta line in Fig. 4a shows that allowing for pond albedo to vary has a negligible effect on pond evolution.

We should note that, when both freeboard sinking and enhanced melting occur simultaneously, the agreement between the 0D model and the 1D model becomes poor if the hypsographic curve is convex (e.g. Fig. 2d, blue curve), and the 0D model should be used with care. Happily, the measured hypsographic curves are mostly concave, in which case the agreement between the two models is excellent.

### 3 A 0D model can approximate observations well using realistic parameters

In Fig. 6, we compare the results from our model to observations made on a 200m long albedo line during SHEBA (red line). Ice along the albedo line was level multiyear ice, but the ponds drained to sea level after some time which makes them amenable to our model (Perovich et. al., 2003). The pond coverage along the albedo line dropped to a minimum around the end of June. Therefore, we choose to model only the period after July 1st. In order to keep the albedo line pristine, no thickness measurements were made. However, relatively close to the albedo line, topography measurements were made along a level multiyear ice profile roughly every ten days. After approximately July 10th, ponds along the topography profile also drained to sea level. We show the topography profile pond coverage in blue dots (we have artificially subtracted 0.05 from the pond coverage to facilitate comparison with the pond coverage along the albedo line). The pond coverage along the topography profile and along the albedo line follow roughly the same trend, suggesting that the physical parameters driving the pond evolution in the two places are likely similar. Based on the average freeboard

height, we estimate the ice thickness on July 10th to be roughly 1.4m along the topography profile, meaning that on July 1st, ice thickness was around 1.6m. Therefore, we assume the same thickness for the ice along the albedo line, and use a hypsographic curve corresponding to the one measured along the topography profile on July 10th (Fig. 2a, dashed line). In order to run our model, we use  
395 the melt rates of bare ice, ponded ice, and ice bottom measured directly using ablation stakes during SHEBA (Perovich et. al., 2003). We choose a realistic  $\rho_b = 850\text{kg m}^{-3}$  (Timco and Frederking, 1996). We have no way of directly constraining the parameters  $\Delta s$  and  $k$  that control the strength of enhanced melting. Therefore, we treat  $S_{em}$  as a fitting parameter. Choosing  $S_{em} = 0.22\text{ month}^{-1}$  fits the observations well by eye. This value can be obtained using  $\Delta s = 15\text{cm}$  and  $k = 1.7$  which  
400 likely fall at the upper end of the range of reasonable values for these constants (see section 4 for a discussion on  $\Delta s$  and  $k$ ). Such a high value of  $S_{em}$  can be explained by a significant contribution from lateral melting.

The full black line in Fig. 6 represents a solution to the full Eq. (25). The agreement between model and observation is excellent, with a maximum discrepancy of 3% pond coverage at the end of the melt  
405 season. The dashed black line represents the contribution to pond growth due to freeboard sinking, whereas the dotted line corresponds to enhanced melting. Almost all pond growth in this case is due to enhanced melting. This is due to ice topography. On multiyear ice, meltwater typically collects in depressions formed by ponds in previous years. The topography created in this way is highly bimodal, and, after drainage, ponds typically have steep walls. Bare ice topography, on the other  
410 hand, is relatively smooth, preventing new pond formation. This is apparent in the hypsographic curve we used. Such a topography inhibits freeboard sinking, and pond coverage grows mostly by enhanced melting acting near the pond sidewalls, growing the existing ponds. In addition to height-dependent enhanced melting we introduced in the previous section, in this case there is likely a significant contribution from lateral melting as well. This contribution helps explain the high value  
415 of  $S_{em}$  we had to choose to get a close agreement between our model and observations. First year ice topography, on the other hand, permits ample pond growth through freeboard sinking. Observations suggest that on first year ice ponds grow primarily due to freeboard sinking (Polashenski et. al., 2012; Landy et. al., 2014).

#### 4 Numerical solutions

420 We now solve Eq. (25) numerically to gain intuition about the behavior of our model. We use a set of realistic parameters we will henceforth refer to as the “default parameters.”

For shortwave, longwave, latent, and sensible heat fluxes, we use values inferred by Skyllingstad et. al. (2009) using hourly measurements from the SHEBA mission. We use the bottom heat flux inferred from measurements of ice bottom ablation during the SHEBA mission (Perovich et. al., 2003).

425 The albedo of bare ice can vary between 0.5 and 0.7 (Hanesiak et. al., 2001), while the albedo of

melt ponds can vary between 0.1 and 0.6, depending on pond depth and conditions of ice at the pond bottom (Morassutti and Ledrew, 1996; Perovich et. al., 1998; Perovich, 1996). Here we prescribe a default bare ice albedo of 0.55, and a default pond albedo of 0.2. We use a realistic bulk ice density of  $\rho_b = 850\text{kg m}^{-3}$  (Timco and Frederking, 1996). We use an initial ice thickness of 1.5m, and  
 430 use the first year ice topography measured by Landy et. al. (2014) adjusted for the prescribed ice thickness and initial pond fraction (usually  $x_i = 0.2$ ). We will assume enhanced melting is entirely due the albedo dependence on height above sea level. Some preliminary results based on field measurements of bare ice albedo on first year ice suggest that albedo changes from around 0.3 near sea level to around 0.55 at a height of around 10cm above sea level, after which the correlation between  
 435 albedo and surface elevation tapers off (Chris Polashenski, pers. comm.). Using such an albedo and the average values of shortwave, longwave, latent, and sensible heat fluxes, we can estimate the rate of melt as a function of height above sea level,  $k(s) = \frac{\overline{F}(s)}{\overline{F}_{bi}}$ . Using Eq. (24), we can then find the integral parameter  $\langle S_{em} \rangle$ . We choose  $\Delta s = 6\text{cm}$  and  $k = 1.7$  to correspond to the same integral parameter. We should note that there is significant scatter in the data, and measurements correspond  
 440 to only one study. Therefore, this is a rough estimate of enhanced melting, but it is likely of the correct order of magnitude.

Figure 5a shows the solution to Eq. (25) for different initial conditions. We can see that ponds grow more rapidly when the initial pond coverage is lower, and the pond evolution curves cluster together as time progresses. This is because lower initial pond coverage corresponds to lower initial  
 445 freeboard height, making the pond growth more rapid. The dashed line corresponds to the solution using the fluxes time-averaged over the 30 day run. The solutions using the averaged fluxes are very similar to the ones using time-varying fluxes, meaning that daily, and even monthly variations in the forcing have little effect on pond growth. This insensitivity to short time scale variations in the forcing means that pond coverage evolution may be faithfully represented in the large scale models,  
 450 as it would not be affected by the coarse time scales of those models. Henceforth, we will use the time-averaged fluxes.

A larger ice thickness means a higher freeboard. For this reason, ponds grow more slowly on thicker ice. Because the pond growth rate is inversely proportional to ice thickness, pond coverage is more sensitive to variations in ice thickness when the ice is thin (Fig. 5b). In Fig. 5b we see that  
 455 a 0.5m difference in the initial ice thickness (between a floe 1.5m and a floe 2m thick) can mean a 20% difference in pond coverage at the end of the melt season.

Figure 5c shows the dependence of pond coverage on albedo. A variation of 0.1 in bare ice albedo has a much larger effect on pond evolution than the same change in pond albedo. The reason is that melting ponded ice only affects pond coverage through downward rigid body motion of the  
 460 floe, whereas melting bare ice grows the ponds through both enhanced melting and freeboard sinking. Furthermore, when pond coverage is low, rigid body motion due to ponded ice melting is less efficient than that due to bare ice melting because it is proportional to melt pond fraction.

The parameters controlling the strength of enhanced melting are the least constrained parameters in our model. In Fig. 5d we show the dependence of pond evolution on the height below which enhanced melting is active,  $\Delta s$ . Exploring a range of realistic values for  $\Delta s$ ,  $0 < \Delta s < 15\text{cm}$ , we find that the pond fraction at the end of the melt season can vary by about 30%. This difference would be larger if we chose a smaller ice thickness. The effects of changing  $k$  are relatively small, so long as  $k$  is large enough (not shown). For example, using current parameters, pond coverage evolution becomes fairly insensitive to  $k$  when  $k > 1.5$ . Smaller values of  $k$ , however, can significantly impact pond evolution. If  $k$  is enough smaller than 1,  $S_{\text{em}}$  can become negative, and the pond coverage can stop growing. In this case, ice near the sea level melts slowly enough such that an upward rigid body movement due to melting ice high above sea level pushes the ice near sea level upwards, preventing pond coverage growth. The evolution of such a pond coverage cannot be represented well in our model since the equation for enhanced melting becomes invalid in this case, and the blue curve in Fig. 5d serves therefore simply as an illustration.

## 5 Pond evolution is slower on smoother ice

The evolution of pond coverage in our model depends on the detailed shape of the hypsographic curve which is not captured by the strengths of freeboard sinking and enhanced melting. As we show below, pond coverage is sensitive to such details, and in particular to ice roughness. Below we will introduce the “effective strengths”,  $S^*$ , which approximately capture the effects of roughness and allow us to estimate mean pond coverage after a period of time. Using effective strengths, we will demonstrate how multiyear ice topography suppresses pond growth by freeboard sinking, while first year ice topography permits it.

In the tangent function parameterization, Eq. (35), the exact shape of the hypsographic curve is determined by parameters  $p_1$  and  $p_2$ . Here, we will not discuss these parameters individually, but will rather focus on often measured bare ice roughness,  $\sigma$ , defined as the standard deviation of surface elevation of ice above sea level:

$$\sigma \equiv \left( \frac{\int_{x_i}^1 s^2(x_h) dx_h}{1 - x_i} - h^2 \right)^{\frac{1}{2}}. \quad (26)$$

We will use the non-dimensional form of bare ice roughness, defined as  $\hat{\sigma} \equiv \frac{\sigma}{h}$ . Typically, a concave hypsographic curve (e.g. Fig. 2d, red curve) will have a small  $\hat{\sigma}$ , whereas a convex hypsographic curve (e.g. Fig. 2d, blue curve) will have a high  $\hat{\sigma}$ .

During the permeable stage, all else equal, ponds will grow more rapidly on rougher ice, since a larger fraction of ice is close to sea level. This is not true on impermeable ice, as meltwater filling deep topographic lows on rough ice will cover a smaller area relative to the same amount of meltwater filling shallow topographic lows on smooth ice. For this reason, the initial pond coverage will likely be smaller on rougher ice due to a smaller pond coverage during the impermeable stage.

Figures 7 show the pond coverage evolution due to pure freeboard sinking (Fig. 7a) and pure enhanced melting (Fig. 7c) for hypsographic curves with different parameters  $p_1$  and  $p_2$  and all other parameters kept constant. For each choice of  $p_1$  and  $p_2$ , we find the normalized bare ice roughness,  $\hat{\sigma}$ , represented by the color of the curves. Blue colors correspond to low roughness and red colors to high roughness. Pond evolution on measured topographies (Fig. 2a) is also shown. We can see that although roughness does not fully determine the pond evolution, it is a viable proxy for how pond coverage will evolve, with high roughness curves typically having a higher average pond coverage.

We wish to quantify the effect of roughness by its impact on the mean pond coverage. In particular, we hope to find the “effective strengths”,  $S^*(\hat{\sigma})$ , which include the roughness effects and allow us to easily estimate the average pond coverage after some time  $t$

$$\langle x(t) \rangle \approx \frac{1}{2} S^* t + x_i, \quad (27)$$

where  $\langle x(t) \rangle \equiv \frac{\int_0^t x(t) dt}{t}$ . Effective strengths are proportional to strengths of freeboard sinking and enhanced melting we derived in section 2.3. In general they themselves may depend on time, and are time-independent only if pond coverage evolution is linear,  $x(t) = St + x_i$ , in which case  $S^* = S$ , where  $S$  is either  $S_{fs} \equiv (S_{bi} + S_{mp} + S_{bot})$  in the case of freeboard sinking or  $S_{em}$  in case of enhanced melting.

In appendix C, we describe the procedure to estimate the effective strengths as functions of non-dimensional roughness and time. Here, we only state the result

$$\begin{aligned} S_{fs}^* &\approx [1.3\hat{\sigma}^2] (S_{bi} + S_{mp} + S_{bot}), \\ S_{em}^* &\approx \left[1 + \left(\frac{2}{\sqrt{\hat{t}_{em}}} - \frac{3}{2}\right)\hat{\sigma}\right] S_{em}, \end{aligned} \quad (28)$$

where  $S_{fs}^*$  is the effective strength of freeboard sinking,  $S_{em}^*$  is the effective strength of enhanced melting, and  $\hat{t}_{em} \equiv \frac{S_{em}t}{1-x_i}$  is the non-dimensional time of pond evolution due to enhanced melting. The terms in square brackets represent the corrections due to roughness. If both freeboard sinking and enhanced melting occur simultaneously the total effective strength is the sum of these two,  $S^* = S_{fs}^* + S_{em}^*$ . Knowing the effective strengths, allows us estimate the mean pond coverage after a period of time without having to run the model.

Roughness has a different effect on freeboard sinking and enhanced melting. Freeboard sinking is roughly independent of time and proportional to the square of non-dimensional roughness. Therefore, it is very sensitive to variations in roughness: doubling the ice roughness roughly quadruples the mean pond coverage due to freeboard sinking after some time. Enhanced melting depends roughly linearly on roughness. However, as roughness tends to zero, the effective strength remains non-zero,  $S_{em}^*(\hat{\sigma} \rightarrow 0) \rightarrow S_{em}$ . Therefore, ponds on smooth ice grow primarily due to enhanced melting. Effective strength also depends on the non-dimensional time,  $\hat{t}$ , and is higher and more sensitive to variations in roughness early in the melt season.

530 Multiyear ice topography shown in Fig. 2a, dashed line, has  $\hat{\sigma} \approx 0.25$  and is significantly smoother than first year ice topography shown in Fig. 2a, solid line, which has  $\hat{\sigma} \approx 0.55$ . From Eq. (28) it follows that freeboard sinking on multiyear ice is roughly 5 times less efficient in growing the ponds than on first year ice.

## 6 Analyzing the 0D model yields useful insight into factors influencing the pond evolution

535 Extracting the dependence of a desired property on physical parameters and understanding its scaling is the main strength of our model. These types of relationships would be difficult to obtain in a more complex model.

The parameters  $S_{bi}^*$ ,  $S_{mp}^*$ ,  $S_{bot}^*$ , and  $S_{em}^*$  control the mean rates of pond growth by melting different regions of ice. Roughly, they represent the amount of pond growth per unit time by freeboard sinking due to melting bare ice; freeboard sinking due to melting ponded ice; freeboard sinking due to melting ice bottom; and enhanced melting. Knowing these parameters allows us to estimate mean pond coverage after a period of time with significant accuracy without having to run the numerical model. Moreover, analyzing them can yield useful insight into the behavior of melt ponds under general circumstances.

545 We can estimate the change in magnitude of the strength of each of the growth modes when a physical parameter  $p$  changes by  $\Delta p$  as

$$\Delta S_i^* = \frac{\partial S_i^*}{\partial p} \Delta p, \quad (29)$$

where  $\Delta S_i^*$  is the change in magnitude of the effective strength of the  $i$ th growth mode. This equation holds so long as the change in the physical parameter is not too large. A change in pond growth rate can then be estimated as  $\Delta S^* = \sum_i \Delta S_i^*$ . Then, using Eq. (27), we can roughly estimate a change in mean pond fraction,  $\Delta \langle x \rangle$ , after some time,  $\Delta t$ , following a change in physical parameter,  $p$ , as  $\Delta \langle x \rangle \approx \frac{1}{2} \Delta S^* \Delta t$ . This provides a means to estimate changes in mean pond coverage under different environmental conditions.

### 6.1 Ponds are more sensitive to changes in bare ice albedo than changes in pond albedo

555 We will illustrate the use of effective strengths using an example where we vary the ice and pond albedos. If the bare ice albedo changes by  $\Delta \alpha_{bi}$ , the change in growth rate would be roughly

$$\Delta S^* = - \left[ S_{bi}^* + \frac{\rho_w - \rho_i}{\rho_w} \frac{(ds_{em}/ds_{fs})^2 + (k-1)}{(1 + \frac{ds_{em}}{ds_{fs}})(k-1)} S_{em}^* \right] \frac{F_{sol}}{F_{bi}} \Delta \alpha_{bi} \approx -0.9 \frac{1}{\text{month}} \Delta \alpha_{bi}. \quad (30)$$

On the other hand, if the melt pond albedo changes by  $\Delta \alpha_{mp}$ , the change in growth rate would be roughly

560 
$$\Delta S^* = - \left[ S_{mp}^* + \frac{(\rho_w - \rho_i) x_i (ds_{em}/ds_{fs})^2 \bar{F}_{mp}}{\rho_w (1 + \frac{ds_{em}}{ds_{fs}})(k-1)(1-x_i) \bar{F}_{bi}} S_{em}^* \right] \frac{F_{sol}}{F_{mp}} \Delta \alpha_{mp} \approx -0.2 \frac{1}{\text{month}} \Delta \alpha_{mp}. \quad (31)$$

It follows from these estimates that after a month the mean pond fraction would differ by roughly 4.5% for a bare ice albedo difference of 0.1, and by around 1% for a pond albedo difference of 0.1. Therefore, variation in pond albedo affects pond evolution roughly five times less than variation in bare ice albedo. This explains our observation from Fig. 5c that pond evolution is much more sensitive to variations in bare ice albedo than to variations in pond albedo. In this way, we also extract the dependence of sensitivity on physical parameters. A major difference between the two sensitivities is their dependence on the initial pond coverage: the sensitivity to pond albedo is proportional to  $x_i$ , whereas the sensitivity to bare ice albedo is proportional to  $1 - x_i$ . In the above example we used  $x_i = 0.2$ , which explains most of the large difference between the two sensitivities. If the pond coverage were higher, variations in the pond albedo could become more important than variations in bare ice albedo. For example, assuming no enhanced melting, the sensitivity to pond albedo would become greater than the sensitivity to bare ice albedo at 50% pond coverage ( $\frac{\Delta S_{mp}^*}{\Delta S_{bi}^*} = \frac{x_i}{1-x_i} \frac{\Delta \alpha_{mp}}{\Delta \alpha_{bi}}$ ).

## 6.2 Under global warming, pond feedback could lead to significant ice thinning

We now use the effective strengths to roughly estimate the impact of global warming on the pond coverage. At high latitudes, feedbacks due to changes in albedo, the atmospheric lapse rate, and clouds can amplify the forcing due to global warming (Holland and Bitz, 2006). For this reason forcing at high latitudes is generally larger than direct radiative forcing due to an increase in CO<sub>2</sub> concentration. In a global warming scenario, the pond growth rate would increase because the ice melts faster, but also because ice at the beginning of the melt would be thinner. We can emulate a global warming scenario by increasing the flux  $F_r$  by a certain amount,  $\Delta F_r$ , and by assuming that the initial ice thickness decreases by  $\Delta H \equiv \frac{\partial H}{\partial F_r} \Delta F_r$ , where  $\frac{\partial H}{\partial F_r}$  is the ice thinning per 1 Wm<sup>-2</sup> of warming. Therefore, we split the change in pond growth rate due to global warming,  $\Delta S^*$ , into a contribution from direct forcing,  $\Delta S_{F_r}^*$ , and a contribution from ice thinning,  $\Delta S_H^*$ . Using the above formalism, we find

$$\begin{aligned} \Delta S_{F_r}^* &\equiv \sum_i \frac{\partial S_i^*}{\partial F_r} \Delta F_r = \left[ \frac{S_{bi}^*}{F_{bi}} + \frac{S_{mp}^*}{F_{mp}} + \frac{\rho_w - \rho_i}{\rho_w} \frac{(ds_{em}/ds_{fs})^2 + (k-1)(1-x_i) S_{em}^*}{(1 + \frac{ds_{em}}{ds_{fs}})(k-1)(1-x_i)} \frac{S_{em}^*}{F_{bi}} \right] \Delta F_r \approx \frac{0.5\%}{\text{W/m}^2 \times \text{month}} \Delta F_r, \\ \Delta S_H^* &\equiv \sum_i \frac{\partial S_i^*}{\partial H} \frac{\partial H}{\partial F_r} \Delta F_r = -(S_{bi}^* + S_{mp}^* + S_{bot}^* + 2S_{em}^*) \frac{1}{H} \frac{\partial H}{\partial F_r} \Delta F_r \approx \frac{1.9\%}{\text{W/m}^2 \times \text{month}} \Delta F_r, \\ \Delta S^* &\equiv \Delta S_{F_r}^* + \Delta S_H^* \approx \frac{2.4\%}{\text{W/m}^2 \times \text{month}} \Delta F_r. \end{aligned} \tag{32}$$

585

The numbers in Eq. (32) were obtained using the default values of the parameters, and  $\frac{\partial H}{\partial F_r} = -0.05 \text{ m}^3 \text{ W}^{-1}$  roughly estimated using the Eisenman and Wettlaufer (2008) model. This means that after a month's growth global warming would increase mean pond coverage by roughly 1.2% per 1 Wm<sup>-2</sup> of warming. Nearly half of this increase in the mean pond coverage comes from an increase in the strength of enhanced melting due to ice thinning. Simulating a 30 day melt numeri-

590

cally using our model predicts an increase in mean pond coverage with forcing at a rate of 1.5% per 1 Wm<sup>-2</sup> of warming for small forcing ( $\Delta F_r \approx 0$ ), which confirms the approximate validity of our linearization. For larger forcing, the sensitivity of pond coverage to forcing increases because the ice thins. Our linearized estimate, Eq. (32), also gives the dependence of the sensitivity on physical parameters. In a likely scenario where the forcing is around 10 Wm<sup>-2</sup>, our estimate predicts that after a month mean pond coverage would increase by around 15%, which corresponds to around 12cm of ice thinning solely due to the pond feedback. Ice thinning after a month directly due to forcing would be only around 9cm, meaning that the pond feedback must be taken into account to understand ice thinning under global warming. Increased forcing could also lead to changes in initial pond coverage, changes in ice roughness or changes in  $\Delta s$  or  $k$ . We ignored these feedbacks, as we have no way of reliably estimating  $\frac{\partial p}{\partial F_r}$  for these parameters.

### 6.3 Different growth modes yield different pond evolution

Each of the four growth modes has different effects on the pond coverage. We will now look in detail at each of the growth modes, their effect on the pond evolution, and their scaling with physical parameters. Figure 8 shows the dependence of growth rate on pond fraction and solutions to Eq. (25) when only one of the strengths is non-zero, assuming a first year ice topography. Figure 9 shows the evolution of pond coverage distribution when only one of the strengths is non-zero.

All modes of growth depend in the same way on the bulk ice density,  $\rho_b$ . Each of the strengths is inversely proportional to  $\rho_b$ , meaning that ponds grow faster on ice with a lower bulk density. The effect is, however, modest: within a reasonable range of  $916\text{kg m}^{-3} > \rho_b > 750\text{kg m}^{-3}$ , pond growth rate can vary by at most 20%.

We will first discuss freeboard sinking. Common to all modes of freeboard sinking is the dependence on ice thickness. Each freeboard sinking growth mode is inversely proportional to the ice thickness,  $S_{\text{fs}}^* \propto \frac{1}{H}$ , meaning that, all else equal, ponds grow proportionally slower on thicker ice.

Although ice roughness may have a different effect on each of the individual modes of freeboard sinking, for simplicity we will assume that they are all affected by roughness in the same way, as parameterized in Eq. (28). In that case, each of these strengths is roughly proportional to the square of the non-dimensional ice roughness,  $S_{\text{fs}}^* \propto \hat{\sigma}^2$ , meaning that pond growth due to freeboard sinking is suppressed on smooth ice.

We will now focus on individual components of freeboard sinking. The parameter  $S_{\text{bi}}^*$  controls pond growth by freeboard sinking due to melting bare ice. On first year ice, owing to the shape of the hypsographic curve, the pond growth rate by bare ice melting increases up to a certain pond coverage and decreases afterwards (Fig. 8, blue line).  $S_{\text{bi}}^*$  is proportional to the flux  $\bar{F}_{\text{bi}}$ , and depends on the initial pond coverage as  $S_{\text{bi}}^* \propto (1 - x_i)^2$ . The quadratic dependence on initial bare ice fraction means that ponds on floes with less initial pond coverage grow faster. It also means that floes that start off less ponded can at some point become more ponded than floes that start off more heavily



ponded. We can see this in Fig. 9a, where the pond coverage distribution narrows up to a certain point, after which it starts to widen again because floes with lower  $x_i$  overtake the floes with higher  $x_i$ . Using the default values of physical parameters of  $\bar{F}_{\text{bi}} = 85 \text{ Wm}^{-2}$ ,  $H = 1.5 \text{ m}$ ,  $x_i = 0.2$ , and  
630  $\hat{\sigma} = 0.55$ , we get  $S_{\text{bi}}^* \approx 0.13 \text{ month}^{-1}$ .

The parameter  $S_{\text{mp}}^*$  controls pond growth by freeboard sinking due to melting ponded ice. The pond growth rate increases with pond fraction from 0 at  $x = 0$  to very high values at high pond coverage, and can be the dominant mode of pond growth if the pond coverage is high enough (Fig. 8, green line). For this reason, giving a representative number to pond growth rate, such as  $S_{\text{mp}}$ ,  
635 is only meaningful if the melt season is short enough such that pond coverage during that period does not change substantially. The dependence on initial pond coverage is  $S_{\text{mp}}^* \propto x_i(1 - x_i)$ . For this reason the pond coverage distribution widens over time when  $S_{\text{mp}}^*$  is dominant (Fig. 9b). Using  $\bar{F}_{\text{mp}} = 171 \text{ Wm}^{-2}$  and other parameters the same as above, we get  $S_{\text{mp}}^* \approx 0.07 \text{ month}^{-1}$ . Although in this case, melting ponded ice affects pond evolution less than bare ice melting, it can become  
640 stronger if the pond coverage is higher. For example,  $S_{\text{mp}}^*$  and  $S_{\text{bi}}^*$  are roughly the same at  $x = 0.35$ , while at  $x = 0.5$ ,  $S_{\text{mp}}^*$  is roughly twice as large as  $S_{\text{bi}}^*$ .

The parameter  $S_{\text{bot}}^*$  controls pond growth by freeboard sinking due to melting of the ice bottom. The pond growth rate due to bottom melting increases with increasing melt pond fraction, although more gradually than in the ponded ice melting case (Fig. 8, red line). Since the growth rate  
645 is proportional to the bare ice fraction,  $S_{\text{bot}}^* \propto (1 - x_i)$ , the pond coverage distribution gets concentrated over time (Fig. 9c). Using  $\bar{F}_{\text{bot}} = 20 \text{ Wm}^{-2}$  and other parameters the same as above, we get  $S_{\text{bot}}^* \approx 0.04 \text{ month}^{-1}$ . The contribution from ice bottom melting becomes larger than the contribution from bare ice melting only at high  $x$ .

Now, we will turn to enhanced melting. The parameter  $S_{\text{em}}^*$  controls pond growth by enhanced  
650 melting, and is the least constrained in our model due to the many poorly-constrained physical processes that potentially contribute to it. Here we will only consider enhanced melting due to height-dependent processes (Eq. (23)) and leave lateral melting for the discussion (subsection 7.1).

Because the growth rate by enhanced melting is inversely proportional to the hypsographic curve, pond growth by enhanced melting is very fast at the beginning of the melt, and decelerates afterwards  
655 (Fig. 8, cyan line). The enhanced melting strength is inversely proportional to the square of the ice thickness,  $S_{\text{em}}^* \propto \frac{1}{H^2}$ , meaning that it is significantly more sensitive to variations in thickness than freeboard sinking. On the other hand it is significantly less sensitive to variations in ice roughness, Eq. (28). Even on perfectly smooth ice,  $\hat{\sigma} = 0$ , ponds will grow due to enhanced melting. In that case, however, lateral melt, rather than height-dependent enhanced melting may dominate.

The strength of enhanced melting is proportional to the height below which enhanced melting  
660 is operational,  $S_{\text{em}}^* \propto \Delta s$ . If we take ice wetting as a physical example, this means that enhanced melting is sensitive to microphysical processes that determine how high above sea level the ice will be wet. The dependence on the parameter  $k$  depends on its magnitude. It appears in  $S_{\text{em}}^*$  in the

term  $\frac{k-1}{ds_{em}/ds_{fs}+1}$ . The term  $ds_{em}/ds_{fs}$  is proportional to  $k-1$ . Therefore, if  $ds_{em}/ds_{fs} \ll 1$ , enhanced  
665 melting is proportional to  $k-1$ . On the other hand, if  $ds_{em}/ds_{fs} \gg 1$ , enhanced melting becomes  
independent of  $k$ . Using default parameters, we find this transition happens at around  $k \approx 1.2$ . In the  
example of ice wetting, this means that enhanced melting is sensitive to albedo variations near sea  
level when ice near sea level has a similar albedo to the rest of the floe. On the other hand, if the  
albedo near sea level is significantly lower than the average, pond growth is insensitive to variations  
670 in properties of ice near sea level.

Enhanced melting is proportional to the cube of the bare ice fraction,  $S_{em}^* \propto (1-x_i)^3$ , making it  
very sensitive to variations in initial pond coverage. For this reason, the pond coverage distribution  
gets quickly concentrated (Fig. 9d), and it is possible for initially less ponded floes to overtake  
initially more ponded floes. If we assume ice wetting is the only physical process responsible for  
675 enhanced melting, we can place a rough estimate on  $S_{sm}^*$ . Taking  $k = 1.7$ ,  $\Delta s = 0.06\text{m}$ , and  $t =$   
30 days, we get for default parameters  $S_{em}^* \approx 0.31 \text{ month}^{-1}$ . This suggests that the contribution to  
mean pond coverage from enhanced melting is slightly larger than the contribution from freeboard  
sinking after 30 days of melt.

The black line in Fig. 8 shows the total pond evolution using the default physical parameters.  
680 The pond growth rate when both freeboard sinking and enhanced melting occur is not simply a  
sum of the growth rates of the four modes since the equations for freeboard sinking and enhanced  
melting are solved separate of each other. Therefore, the dependence of growth rate on pond coverage  
(Fig. 8a, black line) was obtained by finding the derivative of the pond evolution curve. The pond  
growth rate first decreases with pond fraction indicating that enhanced melting dominates early in the  
685 season and then increases indicating that freeboard sinking dominates later in the season. The pond  
coverage distribution using realistic parameters narrows with time (Fig. 9e). Since each growth mode  
affects the pond coverage distribution in a distinct way, fitting both the evolution of the mean and  
the standard deviation of the pond coverage distribution in observational data could add constraints  
on the relevant strengths. Using the above values of strengths, we find that after a month of growth  
690 bare ice melting contributes to roughly 25% of mean pond coverage, ponded ice melting contributes  
to around 13%, ice bottom melting contributes to around 7%, and enhanced melting contributes to  
roughly 55%.

## 7 Discussion

### 7.1 Lateral melting of pond walls by pond water

695 In our model, we focused on vertical changes in topography, and neglected pond growth by lateral  
melting of pond sidewalls by pond water. We will now briefly discuss this possibility.

This type of melt was the main focus of Skillingstad et. al. (2009), who carefully calculated the  
lateral melt rates of pond sidewalls by pond water. The red line in Fig. 10 shows their results. The

rate of change of pond fraction due to a lateral melt flux  $\bar{F}_{\text{lat}}$  is

$$700 \quad \frac{dx_{\text{lat}}}{dt} = \frac{P \bar{F}_{\text{lat}}}{A l \rho_b}, \quad (33)$$

where  $P$  is the total perimeter of the ponds and  $A$  is the area of the floe. If  $\bar{F}_{\text{lat}}$  is constant and the dependence of  $P$  on pond fraction is weak, pond growth is linear, which explains the roughly linear pond coverage evolution in Skyllingstad et. al. (2009). In Fig. 10, black line, we solve Eq. (33) assuming a lateral melt flux proportional to the ponded ice melting flux,  $\bar{F}_{\text{lat}} = K_{\text{lat}} \bar{F}_{\text{mp}}$ , where  
 705  $K_{\text{lat}}$  is a constant. We use the same energy fluxes used by Skyllingstad et. al. (2009), and estimate  $\frac{P}{A} \approx 0.1 \frac{1}{\text{m}}$  from the aerial photographs taken during SHEBA. A nearly perfect match is obtained with  $K_{\text{lat}} = 1.5$ . Therefore, a single constant that relates the rate of melt of ponded ice to the rate of melt of pond walls,  $K_{\text{lat}}$ , is enough to capture the effects of lateral melting on pond growth. This suggests that the complicated physics of lateral melting can, to a large extent, be ignored. More work  
 710 would, however, be needed to determine to what degree  $K_{\text{lat}}$  varies under different circumstances.

If we ignore the topographic variation above sea level, pond growth due to enhanced melting also becomes linear (Eq. (19)). Therefore, lateral melting can approximately be considered a contribution to enhanced melting,  $S_{\text{em}}$ , although it scales differently with physical parameters than the height-dependent enhanced melting, Eq. (23). It is important to note that in this model lateral melt does not  
 715 depend on ice thickness,  $H$ , or on initial pond coverage,  $x_i$ , although, in reality, it may depend on these to some degree. For this reason, the pond coverage distribution width does not change in time, while the mean increases linearly (Fig. 9f).

It is not simple to understand the contribution of lateral melting to pond growth when both lateral and vertical melting occur simultaneously. Each point along the pond boundary can either expand  
 720 by lateral melting or by vertical melting, but not by both. This is because when a point along the pond boundary melts laterally, it creates a completely vertical slope at that point. Therefore a small vertical shift will not grow the ponds, and a large vertical shift will outgrow the lateral expansion. Therefore, if pond growth due to vertical melting is strong, the contribution from lateral melting will be small. This is consistent with observations of Polashenski et. al. (2012) and Landy et. al. (2014)  
 725 who found that on first year ice the contribution from lateral melting is small. On the other hand, steep topography on level multiyear ice inhibits pond expansion through vertical motion and could lead to lateral melting being the dominant mode of growth. This is consistent with our findings of a large contribution from enhanced melting to pond growth on multiyear ice during SHEBA (Fig. 6).

## 7.2 Effects of density variations and internal melt

730 So far, we have assumed that all the melt occurs either on the top or the bottom surface of the ice. However, some of the melt can happen internally, in the bulk of the ice. Internal melt occurs when trapped brine pockets with high salt content expand and dilute in order to reach a thermodynamic equilibrium with the surrounding ice. This phenomenon has been reported to occur both

above and below sea level. Internal melt leads to a reduction in bulk ice density,  $\rho_b$ , which in turn  
 735 affects pond evolution. Accounting for internal melt correctly can be quite challenging as it requires  
 detailed knowledge of the vertical structure of internal melt and bulk density. Nevertheless, we find  
 that although the effects of internal melt and density variation may be significant when considered  
 individually, if considered together, they are likely small.

If internal melt is uniform throughout the vertical ice column, the only effect is a gradual reduction  
 740 in  $\rho_b$  over the course of the melt season, slightly increasing the pond growth rate. If, on the other  
 hand, internal melt has a vertical structure, it will create a vertically non-uniform bulk ice density  
 which can have more complicated effects on pond evolution. Variations in bulk density and internal  
 melt affect pond evolution in the following ways: 1) mass transported across sea level due to rigid  
 body movement depends on the bulk density at sea level, 2) the volume of ice removed by local melt  
 745 depends on the bulk ice density at the surface, 3) freeboard height depends on average bulk densities  
 above and below sea level, and 4) internal melt induces rigid body motion by melting mass above and  
 below sea level, without changing the ice surface. We outline the procedure to include these effects  
 in the pond evolution model in appendix D. The resulting equation for pond coverage evolution has  
 the same form as Eq. (25), with only the strengths modified. Here, we only qualitatively discuss our  
 750 findings. Pond evolution is most sensitive to

1. The difference between the internal melt rate above and below sea level,  $\bar{e}_{asl} - \bar{e}_{bsl}$ , creating a  
 rigid body motion. Here,  $\bar{e}_{asl/bsl}$  is the energy density used for internal melting, averaged over  
 all ice above or below sea level. More internal melt above (below) the sea level will create an  
 upward (downward) rigid body motion of the floe, slowing down (speeding up) pond growth.
- 755 2. The difference between the bulk ice density at the surface and the bulk ice density at sea level,  
 $\rho_b(h) - \rho_b(0)$ , changing the ratio of topographic change due to local melt to rigid body motion.  
 Using default parameters, rigid body motion is upwards, slowing down pond growth. There-  
 fore, a lower (higher) bulk ice density at the surface relative to sea level increases (decreases)  
 the rate of local melt relative to rigid body motion, speeding up (slowing down) pond growth.

760 If considered as independent processes, vertical variations in bulk ice density and internal melt can  
 significantly alter the rate of pond growth. For example, assuming  $\rho_b(0) = 850 \frac{\text{kg}}{\text{m}^3}$ ,  $\rho_b(h) = 750 \frac{\text{kg}}{\text{m}^3}$ ,  
 and no internal melt, leads to a roughly 60% increase in the pond growth rate. However, these  
 processes depend on each other and have the opposite effects on pond evolution. For example a high  
 rate of internal melt above sea level, slowing down pond growth, will lower the bulk ice density  
 765 above sea level, speeding up pond growth.

Density and internal melt can be related via a differential equation,  $\frac{\partial \rho_b(z)}{\partial t} = -\frac{e(z)}{l} - \frac{\partial \rho_b(z)}{\partial z} \frac{ds_{\text{rigid body}}}{dt}$ ,  
 where  $z$  is a vertical coordinate within the ice column. Assuming vertically uniform rates of internal  
 melt above and below sea level, an approximate long-time solution to this equation yields a verti-  
 cally uniform bulk density below sea level, and a linearly decreasing bulk density above sea level.

770 This also defines a long-time relationship between the vertical profiles of internal melt and bulk ice density,  $\bar{e}_{\text{asl}} - \bar{e}_{\text{bsl}} = \frac{l}{h} \frac{ds_{\text{rigid body}}}{dt} (\rho_b(0) - \rho_b(h))$ . Using densities from the example in the paragraph above, and the rate of internal melt obtained in this way, leads to a roughly 10% increase in pond growth rate, significantly less than 60% we found when considering only the effects of vertical density structure.

775 A long-time effect of vertically non-uniform internal melt and density is always a significant compensation between the two, although there may be transient effects. For this reason, we believe that including a vertical structure of density or internal melt in the simple model of pond evolution model is most likely unnecessary.

### 7.3 Under certain conditions, ponds can stop growing

780 Here, we will entertain the possibility of pond growth by vertical motion of the topography stopping entirely for a period of time. This is an example of a possible transient effect of internal melting, which, although interesting, seems unlikely.

If there is enough mass removed above sea level to induce an upward rigid body motion that is able to compensate for the effects of local melting near the sea level, points near the sea level would  
 785 move upwards,  $\frac{ds}{dt} > 0$ , and pond growth would stop. This could, for example, occur if there is strong internal melting above sea level. After a time, however, high internal melt above sea level would lower the bulk ice density at the surface thereby increasing the rate of local melt, and reinitializing pond growth.

We will use an equation for  $\frac{ds}{dt}$  that includes the effects of vertically non-uniform internal melt  
 790 and bulk ice density we derive in appendix D, Eq.(42). Requiring that  $\frac{ds}{dt}(x) > 0$  for any  $x$ , we find the condition for pond growth stopping as

$$k < \frac{\rho_b(h)}{\rho_b(0)} \frac{\rho_i}{\rho_w} \left( 1 + \frac{h}{\bar{F}_{\text{bi}}} (\bar{e}_{\text{asl}} - \bar{e}_{\text{bsl}} \frac{\bar{\rho}_{\text{asl}}}{\bar{\rho}_{\text{bsl}}}) \right) - \frac{\rho_w - \rho_i}{\rho_w} \frac{\bar{F}_{\text{bot}}}{\bar{F}_{\text{bi}}}, \quad (34)$$

where  $\bar{\rho}_{\text{asl/bsl}}$  is the average bulk density above and below sea level. Using the values of internal melt and bulk densities from the previous chapter and taking  $\frac{\bar{\rho}_{\text{asl}}}{\bar{\rho}_{\text{bsl}}} \approx 1$ , we find that in order for ponds  
 795 to stop growing,  $k$  has to be less than 0.85. This is unlikely as ice near the sea level likely melts faster than ice higher up. Nevertheless, if internal melt has not had enough time to adjust densities above and below sea level, it is possible that pond growth could be stopped for a time by the action of internal melt above sea level. For example, assuming the same internal melt as in the previous example but a uniform bulk ice density ( $\rho_b(h) = \rho_b(0)$ ), pond growth would be stopped at  $k = 1$ . In  
 800 this case it is likely that growth by lateral melt would take over, as Eq. (34) ensures only that pond growth by vertical motions is prevented.

## 8 Conclusions

We presented a simple analytical model for melt pond evolution on permeable Arctic sea ice. The model is represented by two ordinary differential equations in which the rate of change of pond coverage depends on pond coverage. The model is governed by four parameters,  $S_{bi}$ ,  $S_{mp}$ ,  $S_{bot}$ , and  $S_{em}$ , that control the rate of pond growth by bare ice melting, ponded ice melting, ice bottom melting, and enhanced melting. Using this model we are able to reproduce observations well.

Our main finding is that we can estimate the mean pond coverage as a function of time without running the model by using “effective strengths:”  $S_{bi}^*$ ,  $S_{mp}^*$ ,  $S_{bot}^*$ , and  $S_{em}^*$ . Here all the physical parameters combine in a known way which permits understanding of the behavior of pond coverage under general conditions. The most important conclusions we draw from analyzing the effective strengths are:

1. Ponds grow slower on smoother ice, with freeboard sinking roughly proportional to the square of the bare ice roughness and enhanced melting increasing roughly linearly with roughness.
2. Ponds respond to both freeboard sinking and enhanced melting on first year ice and almost entirely to enhanced melting on multiyear ice.
3. The pond growth rate is more sensitive to changes in bare sea ice albedo than changes in pond albedo unless the ice is already mostly covered in ponds.
4. Under a global warming scenario, the pond feedback could lead to ice thinning comparable to thinning due to direct forcing.
5. The dependence of ice albedo on height above sea level is likely a significant control on pond evolution.
6. The pond coverage distribution over an ensemble of floes likely narrows over time.
7. Pond evolution is insensitive to small time scale variations in the forcing.
8. If freeboard sinking is suppressed by topography, lateral melting likely plays an important role, making it a significant factor on multiyear ice.
9. The complicated physics of lateral melting can be summarized by a single non-dimensional constant  $K_{lat}$  that relates the lateral melt flux to the flux used for melting the pond bottom.
10. The vertical structure of density and internal melt can likely be ignored.

As melt pond coverage is one of the key controls on summer Arctic sea ice albedo, some representation of it in GCMs is necessary for predicting the future of sea ice and its impact on global climate. With the exception of enhanced melting, our model depends only on parameters that are

either available in large scale models or that can be reasonably estimated. Therefore, if stricter constraints can be placed on the strength of enhanced melting, our model may present an accurate and computationally low-cost representation of sea level melt ponds that could be used in GCMs.

## 9 Appendix A

A good fit to measured hypsographic curves is a tangent function (Fig. 2):

$$s(x_h) = a \left[ \tan \left( \frac{\pi}{2m} p_1 ((x_h - x_i) - p_2(1 - x_i)) \right) + \tan \left( \frac{\pi}{2m} p_1 p_2 (1 - x_i) \right) \right]$$

$$m \equiv \max \left( p_2(1 - x_i), (1 - x_i) - p_2(1 - x_i) \right) \quad (35)$$

Although this function has a cumbersome form, the parameters involved have a clear interpretation.

The requirement that the initial pond fraction is at  $x_h = x_i$  is automatically satisfied as this is a zero of the function Eq. (35). The parameter  $a$  is determined by the requirement of hydrostatic balance,  $\langle s(x_h) \rangle = h$ . Therefore, after specifying the initial pond fraction,  $x_i$ , and the initial ice thickness  $H$ , the only two unconstrained parameters are  $p_1$  and  $p_2$ . Parameter  $0 < p_1 < 1$  determines the level of “variability” of the curve: if  $p_1$  is close to 0,  $s(x_h)$  is roughly linear, whereas if  $p_1$  is close to 1,  $s(x_h)$  is highly curved. Parameter  $p_2$  determines the position of the inflection point of the tangent function relative to  $x_i$ . Therefore  $p_2 < 0$  means that the inflection point is to the left of  $x_i$ , and  $s(x_h)$  is fully convex. For  $p_2 > 1$ , the inflection point is to the right of  $x_h = 1$ , and  $s(x_h)$  is fully concave. If  $0 < p_2 < 1$ ,  $s(x_h)$  transitions from concave to convex at  $x_h = x_i + p_2(1 - x_i)$ . We note that the non-dimensional bare ice roughness,  $\hat{\sigma}$ , for a hypsographic curve defined in this way does not depend on ice thickness or initial pond coverage, but only on parameters  $p_1$  and  $p_2$ . For the hypsographic curve measured by Landy et. al. (2014) for June 25th of 2011, the values of the shape parameters are  $p_1 \approx 0.8$  and  $p_2 \approx 0.4$ , whereas for the hypsographic curve measured during SHEBA (Fig 2a, dashed line) the parameters are  $p_1 \approx 0.9$  and  $p_2 \approx 0.5$ .

## 10 Appendix B

In order to make a connection between a model where a constant fraction of bare ice,  $\delta$ , is affected by enhanced melting, and a model where ice below a fixed elevation,  $\Delta s$ , is affected, we need to estimate how  $\delta$  scales with  $\Delta s$ . It is important to make this connection since several physical mechanisms that significantly affect the melt rate depend on the elevation of ice above sea level. To do this, we will use an alternative model where we assume both freeboard sinking and enhanced melting occur simultaneously, and enhanced melting only affects ice below  $\Delta s$  (Fig. 3d). We define  $x_s$  to be the fraction of ice below  $\Delta s$ ,  $x$  to be the fraction of the ice below sea level, and  $\delta \equiv x_s - x$  to be the difference between the two.  $x_s$  evolves only due to freeboard sinking, whereas  $x$  evolves due to both freeboard sinking and enhanced melting. The equations for the evolution of  $x_s$  and  $x$  are

$$\begin{aligned}
& \frac{dx_s}{dt} = \frac{dx_h}{ds} \Big|_{x_s} \frac{ds_{fs}}{dt} \\
865 \quad \frac{dx}{dt} &= \frac{dx}{ds} \left[ \frac{ds_{fs}}{dt} + \frac{ds_{em}}{dt} \right]. \tag{36}
\end{aligned}$$

Here,  $\frac{ds_{fs}}{dt}$  and  $\frac{ds_{em}}{dt}$  are determined by Eq. (11). Since freeboard sinking does not change the shape of the topography and  $x_s$  evolves only due to freeboard sinking,  $\frac{dx_h}{ds} \Big|_{x_s}$  is simply the inverse slope of the original hypsographic curve evaluated at  $x_s$ . On the other hand, the hypsographic curve near sea level is affected by enhanced melting, and therefore changes shape over time. For this reason,  $\frac{dx}{ds}$ , which relates the change in pond fraction,  $dx$ , to the vertical change in the hypsographic curve at sea level,  $ds$ , changes with time. Nevertheless, if  $\Delta s$  is small enough, we can approximate the hypsographic curve between  $x$  and  $x_s$  to be a straight line, meaning that  $\frac{dx}{ds} \approx \frac{x_s - x}{\Delta s} = \frac{\delta}{\Delta s}$ . This approximation closes our alternative model. This model provides a similar level of agreement with the 1D model as the 0D model Eq. (25), but is more complicated to analyze. For this reason, we focus on Eq. (25) to analyze pond evolution, and use Eq. (36) only in what follows. We note that if the hypsographic curve is convex, Eq. (36) agrees better with the 1D model than Eq. (25). This configuration is, however, unrealistic.

Using  $\frac{dx}{ds} = \frac{\delta}{\Delta s}$ , and subtracting  $\frac{dx}{dt}$  from  $\frac{dx_s}{dt}$  in Eq. (36), we get an equation for evolution of  $\delta$ :

$$\frac{d\delta}{dt} = \frac{dx_h}{ds} \Big|_{(x+\delta)} \frac{ds_{fs}}{dt} - \frac{\delta}{\Delta s} \left[ \frac{ds_{fs}}{dt} + \frac{ds_{em}}{dt} \right]. \tag{37}$$

880 Since  $\frac{ds_{fs}}{dt} + \frac{ds_{em}}{dt}$  is larger than  $\frac{ds_{fs}}{dt}$ ,  $\delta$  decreases until it reaches a constant value after some time. Therefore, a constant  $\Delta s$  model and a constant  $\delta$  model become equivalent after some time. Therefore, finding the value of  $\delta$  for which  $\frac{d\delta}{dt} = 0$ , represents a natural way to relate the two models.

The values of  $\frac{ds_{fs}}{dt}$ ,  $\frac{ds_{em}}{dt}$ , and  $\frac{dx_h}{ds} \Big|_{(x+\delta)}$  themselves depend on pond fraction,  $x$  (Eq. (11)). Furthermore,  $\frac{ds_{fs}}{dt}$  and  $\frac{ds_{em}}{dt}$  depend on the energy fluxes used for melting the ice, which may fluctuate in time. For these reasons,  $\delta$  is never fully constant. To deal with this this, we estimate the magnitudes of  $\frac{ds_{fs}}{dt}$ ,  $\frac{ds_{em}}{dt}$ , and  $\frac{dx_h}{ds} \Big|_{(x+\delta)}$  by substituting  $x \rightarrow x_i$ ,  $\frac{dx_h}{ds} \Big|_{(x+\delta)} \rightarrow \frac{1-x_i}{h}$ , and energy fluxes,  $\overline{F}$ , with their representative values,  $|\overline{F}|$ , e.g. their time-averages. We then find the magnitude of  $\delta$  as

$$\delta = C \frac{\rho_w}{\rho_w - \rho_i} \frac{\Delta s (1 - x_i)^2}{H} \frac{1}{\frac{ds_{em}}{ds_{fs}} + 1}, \tag{38}$$

where  $C$  is a non-dimensional number that does not depend on physical parameters, there to compensate for the crude approximations of using only the initial pond fraction and the average slope of the hypsographic curve. Comparing to 1D model, we find  $C \approx \frac{2}{3}$ . The term  $\frac{ds_{em}}{ds_{fs}}$  is the ratio of magnitudes of  $\frac{ds_{em}}{dt}$  and  $\frac{ds_{fs}}{dt}$ , and is given by

$$\frac{ds_{em}}{ds_{fs}} = \frac{\rho_w}{\rho_w - \rho_i} \frac{|\overline{F}_{bi}|(k-1)}{|\overline{F}_{bi}| + \frac{x_i}{1-x_i} |\overline{F}_{mp}| + \frac{1}{1-x_i} |\overline{F}_{bot}|}. \tag{39}$$

Using  $\delta$  defined in this way in the 0D model, Eq. (25), provides excellent agreement with Eq. (36) and the 1D model run with constant  $\Delta s$ . We note that this agreement is reached in the long-time



limit, and for times shorter than roughly  $\frac{\Delta s}{(ds_{em}/dt + ds_{fs}/dt)}$  some disagreement can persist. Although the magnitude of the disagreement depends on the shape of the hypsographic curve, it is typically not very large, and the 0D model provides a reasonable estimate of pond evolution even for short times.

## 900 11 Appendix C

Here we describe the procedure we used to estimate the effective strengths, Eq. (28). We write the effective strengths as

$$S^* = f(\hat{\sigma}, \hat{t})S, \quad (40)$$

where  $f(\hat{\sigma}, \hat{t})$  is a non-dimensional function of non-dimensional roughness  $\hat{\sigma}$  and non-dimensional  
 905 time  $\hat{t} \equiv \frac{St}{1-x_i}$ , and  $S$  is either  $S_{fs} \equiv (S_{bi} + S_{mp} + S_{bot})$  in the case of freeboard sinking or  $S_{em}$  in  
 case of enhanced melting. The non-dimensional time,  $\hat{t}$ , defined in the above way measures how  
 far the melt season has progressed, with  $\hat{t} = 0$  corresponding to the beginning of pond growth and  
 $\hat{t} = 1$  roughly corresponding to the end of pond growth with entire floe flooded. The function  $f(\hat{\sigma}, \hat{t})$   
 measures how much the mean pond coverage deviates from a mean coverage of linearly evolving  
 910 ponds. For a linear pond evolution,  $x(t) = St + x_i$ , the function  $f(\hat{\sigma}, \hat{t}) = 1$ .

We separately consider freeboard sinking and enhanced melting. For all the curves in Figs. 7a and  
 b, we find  $f(\hat{\sigma}, \hat{t})$  at several different times  $\hat{t}$  as  $f(\hat{\sigma}, \hat{t}) = 2 \frac{\langle x(t) \rangle - x_i}{St}$ . We show the results in Figs.  
 11a and b, where  $f$  are plotted as functions of roughness and different colors correspond to different  
 times  $\hat{t}$ . For any given time, the scatter comes from the fact that the hypsographic curve is not fully  
 915 determined by roughness.

In the case of freeboard sinking,  $f_{fs}$  does not depend much on  $\hat{t}$ . A quadratic  $f_{fs}(\hat{\sigma}, \hat{t}) = c\hat{\sigma}^2$  fits  
 the scatter data well. Based on best fit estimates, we find  $c \approx 1.3$  (Fig. 11a, red dashed line).

In the case of enhanced melting,  $f_{em}$  depends strongly on time  $\hat{t}$ . We choose to parameterize  $f_{em}$   
 with a linear function of the form  $f_{em}(\hat{\sigma}, \hat{t}) = 1 + c(\hat{t})\hat{\sigma}$ . We can approximate  $c(\hat{t})$  by exactly solving  
 920 the equation for enhanced melting, Eq. (19), for a linear hypsographic curve,  $s(x_h) \propto (x_h - x_i)$ .  
 Finding the roughness and  $\langle x(t) \rangle$  in this case, we find  $c(\hat{t}) \approx (\frac{2}{\sqrt{\hat{t}}} - \frac{3}{2})$ . Red dashed lines in Fig.  
 7d show  $f_{em}$  parameterized in this way.

## 12 Appendix D

Here, we outline the procedure to include the effects of vertically non-uniform internal melt and  
 925 bulk ice density. We assume that the bulk ice density,  $\rho_b$ , and the energy density used for melting  
 the ice internally,  $e$ , have a vertical structure,  $\rho_b(z)$  and  $e(z)$ , where  $z$  is positive upwards,  $z = 0$   
 corresponds to sea level, and  $z = h$  corresponds to ice surface.

Mass transported across sea level depends on the bulk density at the sea level, the rate of local melting depends on the bulk ice density at the surface, and the freeboard height depends on the average densities above and below sea level,  $\bar{\rho}_{\text{asl/bsl}}$ . Internal melt above and below sea level creates a rigid body motion. This is summarized as

$$\begin{aligned}
dm^{\text{rigid body}} &= \rho_b(0)A_{\text{bi}}ds_{\text{rigid body}} , \\
dm_{\text{above s. l.}}^{\text{melt}} &= -A_{\text{bi}}\frac{\bar{F}_{\text{bi}}}{l}dt - A_{\text{bi}}h\frac{\bar{e}_{\text{asl}}}{l}dt , \\
dm_{\text{below s. l.}}^{\text{melt}} &= -A_{\text{mp}}\frac{\bar{F}_{\text{mp}}}{l}dt - A\frac{\bar{F}_{\text{bot}}}{l}dt - AH_d\frac{\bar{e}_{\text{bsl}}}{l}dt , \\
h &= \frac{\rho_w - \rho_i}{\rho_w} \frac{H}{1-x} \frac{1}{1 - \Delta\rho_b \frac{\rho_i}{\rho_w}} , \\
\frac{ds_{\text{loc}}}{dt}(\mathbf{r}) &= -k(\mathbf{r})\frac{\bar{F}_{\text{bi}}}{l\rho_b(h)} , \tag{41}
\end{aligned}$$

where  $H_d$  is the ice draft depth defined as the volume of ice below sea level divided by the area of the ice floe,  $\bar{e}_{\text{asl/bsl}}$  is the energy density used for internal melting averaged over all ice above or below sea level, and  $\Delta\rho_b \equiv \frac{\bar{\rho}_{\text{bsl}} - \bar{\rho}_{\text{asl}}}{\bar{\rho}_{\text{bsl}}}$  is the relative difference in mean bulk density above and below sea level.

With these changes, we can find the equation for pond coverage evolution straightforwardly, by repeating all of the steps from section 2. We first derive the equation for the vertical motion of points near the sea level

$$\begin{aligned}
\frac{ds}{dt} &= -\left[ (k-1)\frac{\bar{F}_{\text{bi}}}{l\rho_b(h)} \right] - \\
&- \left[ \frac{1}{l\rho_b(0)} \left( \bar{F}_{\text{bi}} \left( \frac{\rho_b(0)}{\rho_b(h)} - \frac{\rho_i}{\rho_w} \right) + \frac{(\rho_w - \rho_i)x}{\rho_w(1-x)} \bar{F}_{\text{mp}} + \frac{\rho_w - \rho_i}{\rho_w(1-x)} \bar{F}_{\text{bot}} + \frac{\rho_i}{\rho_w} h\bar{e}_{\text{bsl}}(\Delta e - \Delta\rho_b) \right) \right] , \tag{42}
\end{aligned}$$

where  $\Delta e \equiv \frac{\bar{e}_{\text{bsl}} - \bar{e}_{\text{asl}}}{\bar{e}_{\text{bsl}}}$  is the relative difference in average energy density used for internal melting below and above sea level. The two terms in square brackets correspond to enhanced melting and freeboard sinking. Then we repeat the procedure to relate Eq. (42) to the change in pond coverage.

The resulting equation has the same form as Eq. (25), with only the strengths modified

$$\begin{aligned}
S_{\text{int}} &= \frac{(1-x_i)\frac{\rho_i}{\rho_w}\bar{e}_{\text{bsl}}(\Delta e - \Delta\rho_b)}{l\rho_b(0)} , \\
S_{\text{bi}} &= \frac{(1-x_i)^2(1 - \Delta\rho_b \frac{\rho_i}{\rho_w})(1 + \frac{\rho_w(\rho_b(0) - \rho_b(h))}{\rho_b(h)(\rho_w - \rho_i)})}{Hl\rho_b(0)} \bar{F}_{\text{bi}} , \\
S_{\text{mp}} &= \frac{(1-x_i)x_i(1 - \Delta\rho_b \frac{\rho_i}{\rho_w})}{Hl\rho_b(0)} \bar{F}_{\text{mp}} , \\
S_{\text{bot}} &= \frac{(1-x_i)(1 - \Delta\rho_b \frac{\rho_i}{\rho_w})}{Hl\rho_b(0)} \bar{F}_{\text{bot}} , \\
S_{\text{em}} &= \left( \frac{\rho_w}{\rho_w - \rho_i} \right)^2 \frac{2\Delta s(1-x_i)^3(k-1)(1 - \Delta\rho_b \frac{\rho_i}{\rho_w})^2}{3H^2l\rho_b(0)(1 + \frac{ds_{\text{em}}}{ds_{\text{is}}})} \bar{F}_{\text{bi}} . \tag{43}
\end{aligned}$$

Here, the strength of internal melting,  $S_{\text{int}}$  should be included in the equation for freeboard sinking.

The term  $\frac{ds_{\text{em}}}{ds_{\text{is}}}$  is given by the ratio of the two terms in Eq. 42. The equation for pond growth, Eq.

(25), using the above strengths, Eq. (43), should also be supplemented with an equation for evolution of bulk density

$$950 \quad \frac{\partial \rho_b(z)}{\partial t} = -\frac{e(z)}{l} - \frac{\partial \rho_b(z)}{\partial z} \frac{ds_{\text{rigid body}}}{dt}. \quad (44)$$

*Acknowledgements.* We thank B. Cael Barry, Daniel Koll, Edwin Kite, and Mary Silber for reading the paper and giving useful comments. We also thank Douglas MacAyeal, and Edwin Kite for discussions and ideas about the physical mechanisms involved. We thank Chris Polashenski for an extensive review and useful discussions that greatly improved this manuscript and for providing data on the dependence of the albedo on surface elevation. We also thank an anonymous reviewer. We thank Don Perovich for providing data from the SHEBA mission. Predrag Popović was supported by a NASA Earth and Space Science Fellowship. This work was partially supported by the National Science Foundation under NSF award number 1623064 and under NSF award number 0940261, which is part of the Mathematics and Climate Research Network.

## References

- 960 Abbot, D. S., Silber, M., and Pierrehumbert, R. T.: Bifurcations leading to summer Arctic sea ice loss, *J. Geophys. Res.*, 116(D19), 2011.
- Eicken, H., Grenfell, T. C., Perovich, D. K., Richter-Menge, J. A., and Frey, K.: Hydraulic controls of summer Arctic pack ice albedo, *J. Geophys. Res.*, 109(C8), doi:10.1029/2003jc001989, 2004.
- Eisenman, I. and Wettlaufer, J. S.: Nonlinear threshold behavior during the loss of Arctic sea ice, *Proceedings of the National Academy of Sciences*, 106(1), 28–32, doi:10.1073/pnas.0806887106, 2008.
- 965 Flocco, D., and Feltham, D. L.: A continuum model of melt pond evolution on Arctic sea ice, *J. Geophys. Res.*, 112(C8). doi:10.1029/2006jc003836, 2007.
- Flocco, D., Feltham, D. L. and Turner, A. K.: Incorporation of a physically based melt pond scheme into the sea ice component of a climate model, *J. Geophys. Res.*, 115(C8), doi:10.1029/2009jc005568, 2010.
- 970 Hanesiak, J. M., Barber, D. G., De Abreu, R. A., and Yackel, J. J.: Local and regional albedo observations of arctic first-year sea ice during melt ponding, *J. Geophys. Res. Oceans*, 106(C1), 1005?1016. doi:10.1029/1999jc000068, 2001.
- Holland, M. M., and Bitz, C. M.: Polar amplification of climate change in coupled models, *Climate Dynamics*, 21(3-4), 221?232. doi:10.1007/s00382-003-0332-6, 2003.
- 975 Holland, M. M., Bitz, C. M. and Tremblay, B.: Future abrupt reductions in the summer Arctic sea ice, *Geophys. Res. Lett.*, 33(23), doi:10.1029/2006gl028024, 2006.
- Holland, M. M., Bailey, D. A., Briegleb, B. P., Light, B. and Hunke, E.: Improved Sea Ice Shortwave Radiation Physics in CCSM4: The Impact of Melt Ponds and Aerosols on Arctic Sea Ice\*, *J. Climate*, 25(5), 1413–1430, doi:10.1175/jcli-d-11-00078.1, 2012.
- 980 Landy, J., Ehn, J., Shields, M., and Barber, D.: Surface and melt pond evolution on landfast first-year sea ice in the Canadian Arctic Archipelago, *J. Geophys. Res. Oceans*, 119(5), 3054–3075, doi:10.1002/2013jc009617, 2014.
- Lüthje, M., Feltham, D. L., Taylor, P. D., and Worster, M. G.: Modeling the summertime evolution of sea-ice melt ponds. *J. Geophys. Res.*, 111(C2). doi:10.1029/2004jc002818, 2006.
- 985 Morassutti, M. P. and Ledrew, E. F.: Albedo And Depth Of Melt Ponds On Sea-Ice, *Int. J. Climatol.*, 16(7), 817–838, doi:10.1002/(SICI)1097-0088(199607)16:7<817::AID-JOC44>3.0.CO;2-5, 1996.
- North, G.R.: The Small Ice Cap Instability in Diffusive Climate Models, *Journal of the Atmospheric Sciences*, 41(23), 3390-3395, 1984.
- Pedersen, C. A., Roeckner, E., Lüthje, M. and Winther, J. G.: A new sea ice albedo scheme including melt ponds  
990 for ECHAM5 general circulation model, *J. Geophys. Res.*, 114(D8), doi:10.1029/2008jd010440, 2009.
- Perovich, D. K.: The Optical Properties of Sea Ice, No. MONO-96-1. Cold Regions Research and Engineering Lab Hannover NH, 1996.
- Perovich, D. K., and Polashenski, C.: Albedo evolution of seasonal Arctic sea ice, *Geophys. Res. Lett.*, 39(8), doi:10.1029/2012gl051432, 2012.
- 995 Perovich, D. K. and Richter-Menge, J. A.: Loss of Sea Ice in the Arctic\*. *Annu. Rev. Marine. Sci.*, 1(1), 417–441. doi:10.1146/annurev.marine.010908.163805, 2009.
- Perovich, D. K., Roesler, C. S., and Pegau, W. S.: Variability in Arctic sea ice optical properties, *J. Geophys. Res.*, 103(C1), 1193, doi:10.1029/97jc01614, 1998.

- Perovich, D. K., Thomas, C. G., Richter-Menge, J. A., Light, B., Tucker, W. B., and Eicken, H.:  
1000 Thin and thinner: Sea ice mass balance measurements during SHEBA, *J. Geophys. Res.*, 108(C3),  
doi:10.1029/2001jc001079, 2003.
- Perovich, D. K., Light, B., Eicken, H., Jones, K. F., Runciman, K. and Nghiem, S. V.: Increasing solar heating  
of the Arctic Ocean and adjacent seas, 1979–2005: Attribution and role in the ice-albedo feedback, *Geophys.*  
*Res. Lett.*, 34(19), doi:10.1029/2007gl031480, 2007.
- 1005 Polashenski, C., Perovich, D., and Courville, Z.: The mechanisms of sea ice melt pond formation and evolution,  
*J. Geophys. Res.*, 117(C1). doi:10.1029/2011jc007231, 2012.
- Scott, F. and Feltham, D. L.: A model of the three-dimensional evolution of Arctic melt ponds on first-year and  
multiyear sea ice, *J. Geophys. Res.*, 115(C12), doi:10.1029/2010jc006156, 2010.
- Screen, J. A. and Simmonds, I.: The central role of diminishing sea ice in recent Arctic temperature amplifica-  
1010 tion, *Nature*, 464(7293), 1334–1337, doi:10.1038/nature09051, 2010.
- Serreze, M. C., and Stroeve, J.: Arctic sea ice trends, variability and implications for seasonal ice forecasting,  
*Phil. Trans. R. Soc. A*, 373(2045), 20140159, doi:10.1098/rsta.2014.0159, 2015.
- Skyllingstad, E.D., Paulson, C.A. and Perovich, D.K.: Simulation of melt pond evolution on level ice. *J. Geo-*  
*phys. Res.: Oceans*, 114(C12). doi:10.1029/2009jc005363, 2009.
- 1015 Stroeve, J., Holland, M. M., Meier, W., Scambos, T. and Serreze, M.: Arctic sea ice decline: Faster than forecast,  
*Geophys. Res. Lett.*, 34(9), doi:10.1029/2007gl029703, 2007.
- Taylor, P. D., and Feltham, D. L.: A model of melt pond evolution on sea ice, *J. Geophys. Res. Oceans*,  
109(C12). doi:10.1029/2004jc002361, 2004.
- Timco, G., and Frederking, R.: A review of sea ice density, *Cold Regions Science and Technology*, 24(1), 1-6.  
1020 doi:10.1016/0165-232x(95)00007-x, 1996.
- Webster, M. A., Rigor, I. G., Perovich, D. K., Richter-Menge, J. A., Polashenski, C. M., and Light, B.:  
Seasonal evolution of melt ponds on Arctic sea ice, *J. Geophys. Res. Oceans*, 120(9), 5968–5982,  
doi:10.1002/2015jc011030, 2015.
- Yackel, J. J., Barber, D. G. and Hanesiak, J. M.: Melt ponds on sea ice in the Canadian Archipelago:  
1025 1. Variability in morphological and radiative properties, *J. Geophys. Res.*, 105(C9), 22049–22049,  
doi:10.1029/2000jc900075, 2000.
- Zhang, J., Lindsay, R., Steele, M. and Schweiger, A.: What drove the dramatic retreat of arctic sea ice during  
summer 2007?, *Geophys. Res. Lett.*, 35(11), doi:10.1029/2008gl034005, 2008.

| Parameter                                                                                                  | Meaning                                                                                                                                                                                             |
|------------------------------------------------------------------------------------------------------------|-----------------------------------------------------------------------------------------------------------------------------------------------------------------------------------------------------|
| $t, \hat{t}$                                                                                               | Time and non-dimensional time, $\hat{t} = \frac{St}{1-x_i}$ .                                                                                                                                       |
| $s(\mathbf{r})$                                                                                            | Surface elevation above sea level at point $\mathbf{r}$ .                                                                                                                                           |
| $s(x_h), \widehat{s}(x_h), \frac{d\widehat{s}}{dx_h}$                                                      | Hypsographic curve, non-dimensional hypsographic curve, $\widehat{s}(x_h) = \frac{s(x_h)}{h}$ , and its non-dimensional derivative, $\frac{d\widehat{s}}{dx_h} = \frac{1-x_i}{h} \frac{ds}{dx_h}$ . |
| $ds_{\text{rigid body}}, ds_{\text{loc}}(\mathbf{r})$                                                      | Change in surface elevation due to rigid body motion and due to local melting at point $\mathbf{r}$ .                                                                                               |
| $ds_{\text{fs}}, ds_{\text{em}}, ds_{\text{em}}/ds_{\text{fs}}$                                            | Change in surface elevation due to freeboard sinking, due to enhanced melting, and the magnitude of their ratio.                                                                                    |
| $dm_{\text{above/below s. l.}}^{\text{melt/rigid body}}$                                                   | Change in mass above and below sea level due to ice melting or rigid body motion.                                                                                                                   |
| $x, \widehat{x}, \widehat{1-x}$                                                                            | Pond fraction, normalized pond fraction $\widehat{x} = \frac{x}{x_i}$ , and normalized bare ice fraction, $\widehat{1-x} = \frac{1-x}{1-x_i}$                                                       |
| $x_i$                                                                                                      | Initial pond fraction.                                                                                                                                                                              |
| $x_h$                                                                                                      | Fraction of ice below an elevation given by the hypsographic curve.                                                                                                                                 |
| $x_s$                                                                                                      | Fraction of ice below $\Delta s$ .                                                                                                                                                                  |
| $x_{\text{fs}}(t), x_{\text{em}}(t), x_{\text{lat}}(t)$                                                    | Pond coverage evolution due to freeboard sinking, enhanced melting, and lateral melting.                                                                                                            |
| $A, A_{\text{bi}}, A_{\text{mp}}$                                                                          | Areas of the floe, bare ice, and melt ponds                                                                                                                                                         |
| $P$                                                                                                        | Total perimeter of the ponds.                                                                                                                                                                       |
| $\rho_w, \rho_i, \rho_b$                                                                                   | Densities of salt water, pure ice, and bulk ice once all the brine has drained.                                                                                                                     |
| $l$                                                                                                        | Latent heat of melting.                                                                                                                                                                             |
| $H, h$                                                                                                     | Initial thickness of the ice and average initial freeboard height.                                                                                                                                  |
| $\sigma, \hat{\sigma}$                                                                                     | Bare ice roughness and non-dimensional bare ice roughness, $\hat{\sigma} = \frac{\sigma}{h}$ .                                                                                                      |
| $p_1, p_2$                                                                                                 | Shape parameters of the hypsographic curve that control the ‘‘amount of variability’’ of the curve and the location of the inflection point.                                                        |
| $k(\mathbf{r})$                                                                                            | Ratio of the melt rate at point $\mathbf{r}$ to the average rate of bare ice melting.                                                                                                               |
| $\Delta s$                                                                                                 | Height above sea level below which there is enhanced melting.                                                                                                                                       |
| $\delta$                                                                                                   | Fraction of the ice affected by enhanced melting.                                                                                                                                                   |
| $\alpha_{\text{bi}}, \alpha_{\text{mp}}$                                                                   | Albedos of bare ice and melt ponds.                                                                                                                                                                 |
| $F_{\text{sol}}, F_{\text{r}}$                                                                             | Solar energy flux and the sum of longwave, latent, and sensible heat fluxes.                                                                                                                        |
| $\overline{F}_{\text{bi}}, \overline{F}_{\text{mp}}, \overline{F}_{\text{bot}}, \overline{F}_{\text{lat}}$ | Fluxes of energy used for melting bare ice, ponded ice, ice bottom, and lateral melting averaged over bare ice, ponded ice, ice bottom, and the pond perimeter.                                     |
| $ \overline{F} $                                                                                           | Representative values of fluxes, e.g. their time-averages.                                                                                                                                          |
| $K_{\text{lat}}$                                                                                           | Constant relating the flux of energy used for melting ponded ice to the flux of energy used for lateral melting.                                                                                    |
| $S_{\text{bi}}, S_{\text{mp}}, S_{\text{bot}}, S_{\text{em}}$                                              | Strengths of bare ice melting, ponded ice melting, ice bottom melting, and enhanced melting.                                                                                                        |
| $S_{\text{bi}}^*, S_{\text{mp}}^*, S_{\text{bot}}^*, S_{\text{em}}^*$                                      | Effective strengths of bare ice melting, ponded ice melting, ice bottom melting, and enhanced melting, that take into account the effects of bare ice roughness.                                    |
| $S_{\text{fs}}^*$                                                                                          | Effective strength of freeboard sinking, $S_{\text{fs}}^* = S_{\text{bi}}^* + S_{\text{mp}}^* + S_{\text{bot}}^*$ .                                                                                 |
| $S^*$                                                                                                      | Total effective strength, $S^* = S_{\text{bi}}^* + S_{\text{mp}}^* + S_{\text{bot}}^* + S_{\text{em}}^*$ .                                                                                          |

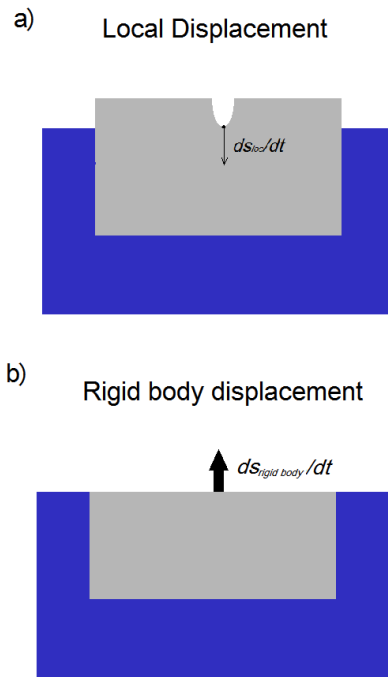

**Figure 1.** a) Local displacement represents the movement of a point on the ice surface as a result of ice melting at that particular point. It is a function only of local ice characteristics at that point. For both local and hydrostatic displacements the positive direction is defined as upwards. b) Rigid body displacement represents the motion of a floe as a whole in an effort to maintain hydrostatic balance because melting removes mass above or below sea level. Melting above sea level induces an upward motion of the floe, whereas melting below sea level induces a downward motion.

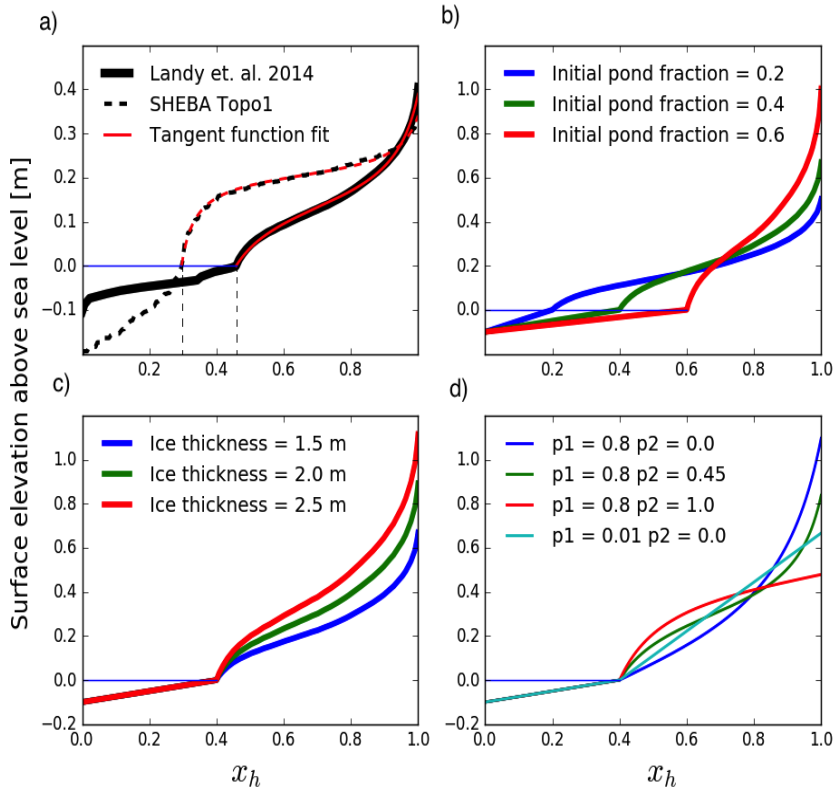

**Figure 2.** Hypsographic curves showing the percentage of the sea ice surface that is lower than a particular elevation. Pond coverage on highly permeable sea ice can be inferred from here as the intersection of sea level (horizontal blue line) with the hypsographic curve. a) A hypsographic curve measured by Landy et. al. (2014) on June 25th of 2011 (solid black line), and a hypsographic curve measured during SHEBA along a 100m long “topography profile 1” on July 10th 1998 (black dashed line). The vertical dashed lines represent the pond coverage, assuming that ice is permeable. The red line represents a fit to the part of the hypsographic curve above sea level with a tangent function, Eq. (35). b) Adjusted hypsographic curves for different initial pond coverage, and the same ice thickness. c) Adjusted hypsographic curves for the same initial pond coverage and different ice thickness. d) Hypsographic curves for different shape parameters,  $p_1$  and  $p_2$ , defined and discussed in appendix A, Eq. (35). Parameter  $p_1$  controls the amount of curvature, while  $p_2$  controls the position of the inflection point of the tangent function.



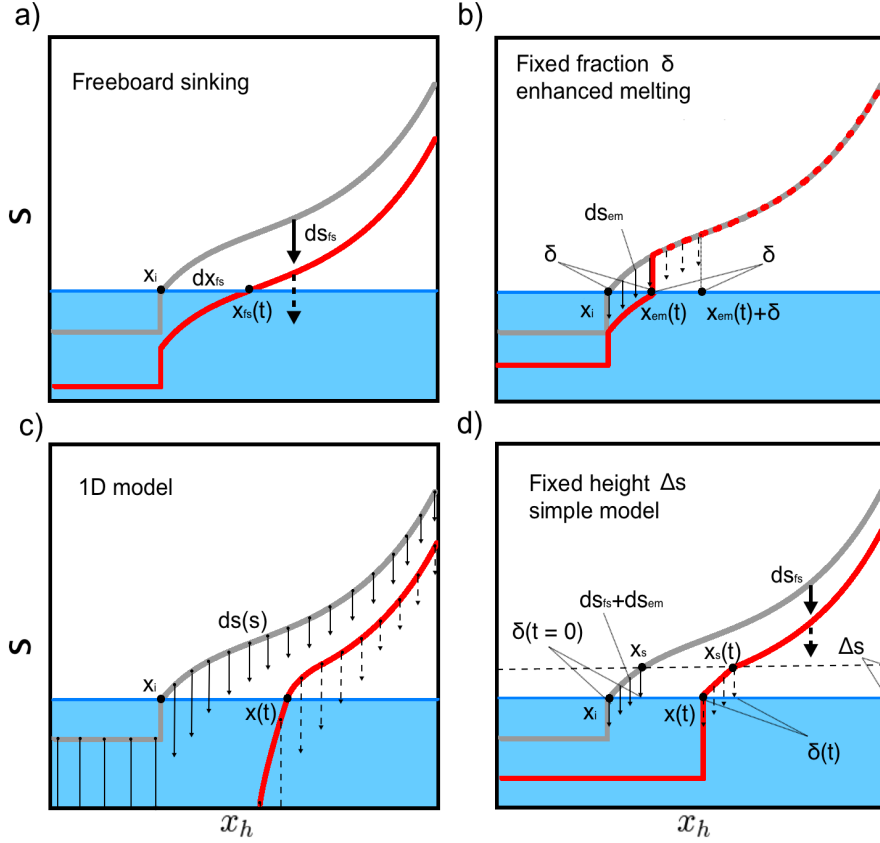

**Figure 3.** Explanation of different models of pond growth. Models evolve a hypsographic curve,  $s(x_h)$ , above sea level to find the pond coverage evolution. Evolution of the hypsographic curve below sea level is not relevant for pond growth and, apart from the 1D model, is not captured well in these models. a) Freeboard sinking shifts the entire hypsographic curve downward following a displacement of  $ds_{fs}$ . b) Enhanced melting acts on a constant ice fraction,  $\delta$ , and there is no freeboard sinking. The hypsographic curve changes only between  $x_h = x$  and  $x_h = x + \delta$ , and remains unchanged otherwise. After a time  $\Delta t = \frac{s(x+\delta)}{ds_{em}/dt}$  pond coverage grows by  $\delta$ . The 0D model, Eq. (25), assumes that the total pond evolution is the sum of pond evolution due to such enhanced melting and freeboard sinking (panel a). c) The 1D model prescribes a melt rate at each point on the hypsographic curve as a function of height above sea level,  $\frac{ds}{dt}(s)$ . d) A simplified model that assumes both freeboard sinking and enhanced melting (appendix B). Enhanced melting occurs only below height  $\Delta s$ . After some time, the fraction of ice affected by enhanced melting,  $\delta$ , becomes constant, meaning that a constant fraction model (panel b) and a constant height model are equivalent if  $\delta$  and  $\Delta s$  are related appropriately.

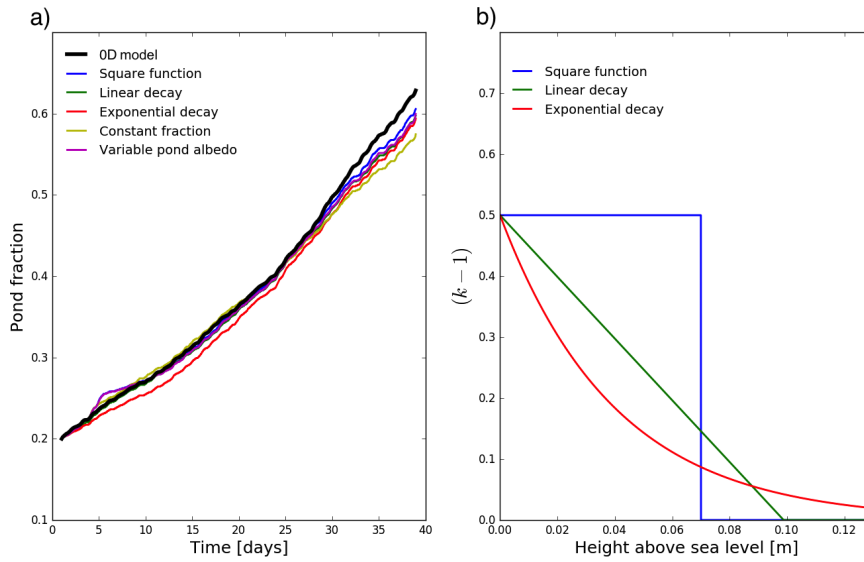

**Figure 4.** a) A comparison between pond evolution in the 0D model and the 1D model. The black curve represents the 0D model. The blue, green, and red curves represent the 1D model for different functions  $k(s)$  shown in panel b). These different functions were chosen such that the integral parameter  $\langle S_{em} \rangle$  (Eq. (24)) is the same as for the 0D model. The yellow curve represents the 1D model where enhanced melting acts on a constant fraction of bare ice,  $\delta$ , chosen according to Eq. (21). The magenta curve represents the 1D model with pond albedo varying with depth. There is significant agreement between all of the curves, suggesting that the simplifications made in the simple model were justified. Since including variable pond albedo does not change the pond evolution significantly, this detail can be neglected when estimating the pond coverage on permeable ice. b) The blue, green, and red lines represent functions  $k(s) - 1$  used to run the 1D model.

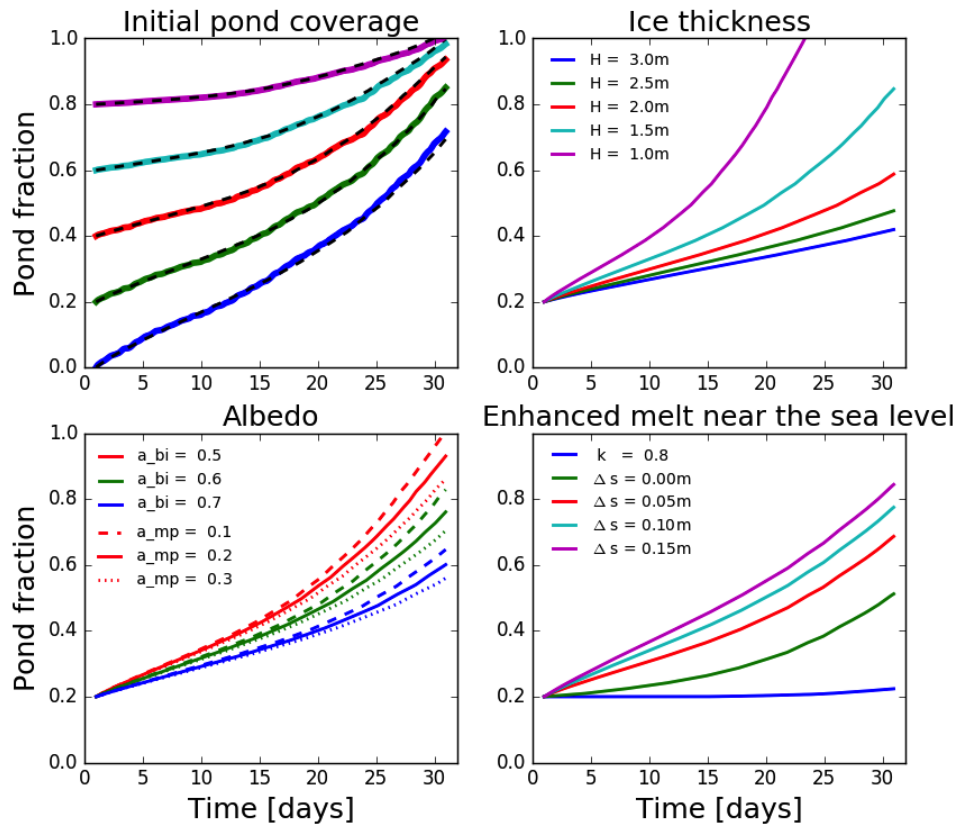

**Figure 5.** Numerical solutions to Eq. (25) with parameters varied around the defaults described in the text. a) Varying initial pond coverage. Solid lines represent solutions using full time-varying fluxes, while dashed lines represent solutions using time-averaged fluxes. The two solutions are very similar, so we subsequently use only the time-averaged fluxes. b) Varying ice thickness. Ponds grow slower on thicker floes. c) Varying pond and bare ice albedo. Different colors represent different bare ice albedos, and full, dotted, and dashed lines represent different pond albedos. A change in bare ice albedo has a much larger effect on pond fraction than the same change in pond albedo. d) Varying the  $\Delta s$  and  $k$ . For  $k = 0.8$ , the ponds shrink. However, pond evolution for  $k < 1$  is not represented well in our model, so this curve serves only as an illustration.

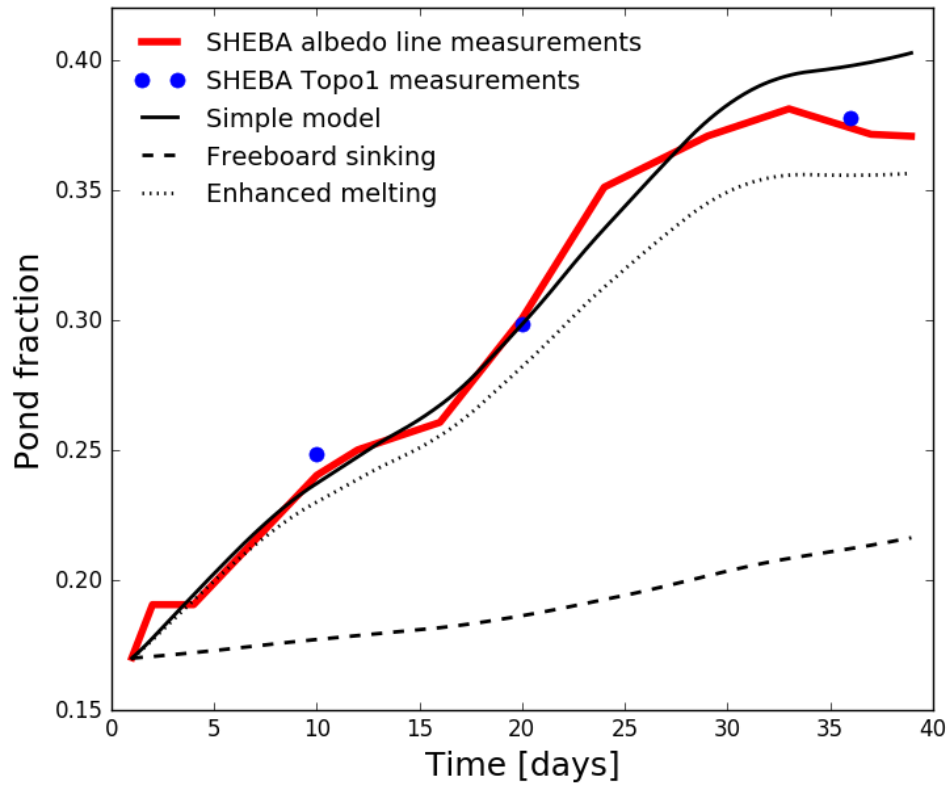

**Figure 6.** A comparison between measurements of pond fraction made during SHEBA along the albedo line (red line), along a topography profile (blue dots), and our model (black line). The blue dots have been shifted downward by 0.05 to make a more obvious comparison between albedo line and topography profile trends. The black dashed line is the contribution to our model from freeboard sinking and the black dotted line is the contribution from enhanced melting. Ponds grow almost entirely due to enhanced melting as a result of the steep topography of multiyear ice.

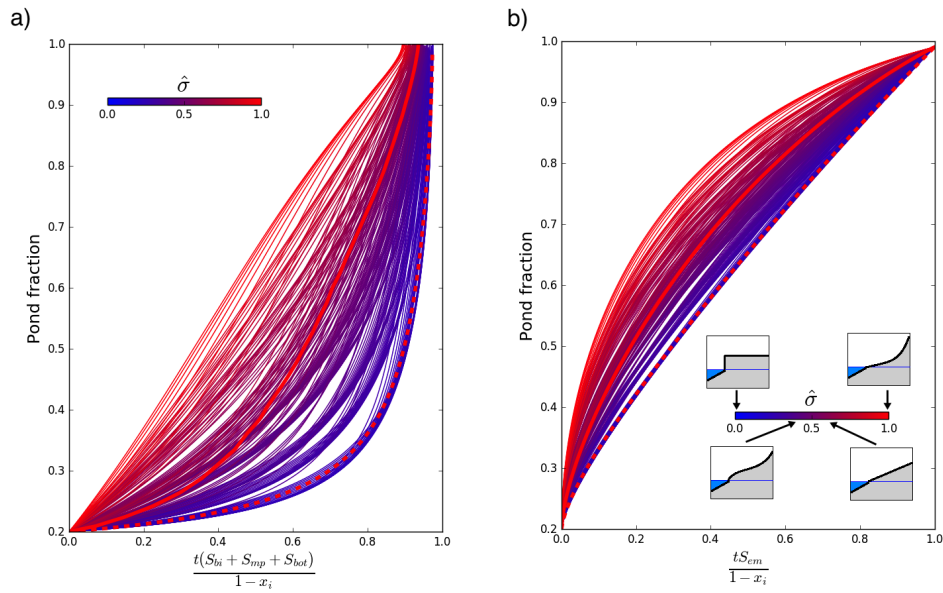

**Figure 7.** Exploring the effects of sea ice roughness. a) Pond evolution due to pure freeboard sinking for hypsographic curves with different shape parameters  $p_1$  and  $p_2$ . The x-axis shows non-dimensional time  $\hat{t} = \frac{t(S_{bi} + S_{mp} + S_{bot})}{1 - x_i}$ . Color represents normalized roughness,  $\hat{\sigma}$ , with blue colors corresponding to small  $\hat{\sigma}$  and red colors corresponding to large  $\hat{\sigma}$ . Thick red solid line represents pond evolution on the measured first year ice hypsographic curve, and the thick red dashed line represents pond evolution on the measured multiyear ice hypsographic curve. All else equal, rougher ice has a larger pond fraction. b) Pond evolution due to pure enhanced melting for hypsographic curves with different shapes. The x-axis shows non-dimensional time  $\hat{t} = \frac{tS_{em}}{1 - x_i}$ . Cartoon examples of hypsographic curves and their approximate positions along the  $\hat{\sigma}$ -axis are also shown.

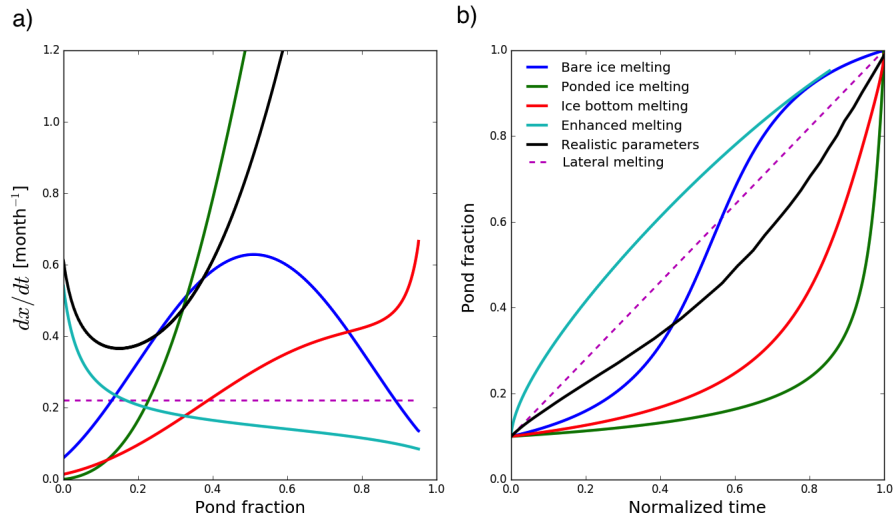

**Figure 8.** a) Dependence of growth rate on pond coverage for different modes of pond growth. The y-axis shows the growth rate,  $\frac{dx}{dt}$ , for each of the growth modes calculated using the default parameters and  $x_i = 0$ . Pond growth rate for bare ice melting (blue line) first increases up to a certain pond coverage and then decreases. Ponded ice melting (green line) increases with pond coverage from  $\frac{dx}{dt} = 0$  at  $x = 0$  to very high values at high pond coverage. The ice bottom melting rate (red line) gradually increases with pond coverage. The vertical enhanced melting rate (cyan line) decreases with pond coverage. The black line represents a realistic combination of the four growth modes, and shows that pond growth is dominated by enhanced melting early in the season, and by freeboard sinking late in the season. The dashed magenta line represents lateral melting estimated using parameters described in section 7.1. b) Solutions to Eq. (25) when only one of the growth modes is active. The x-axis shows the normalized time, where 0 corresponds to the beginning of the melt and 1 to entire floe being flooded.

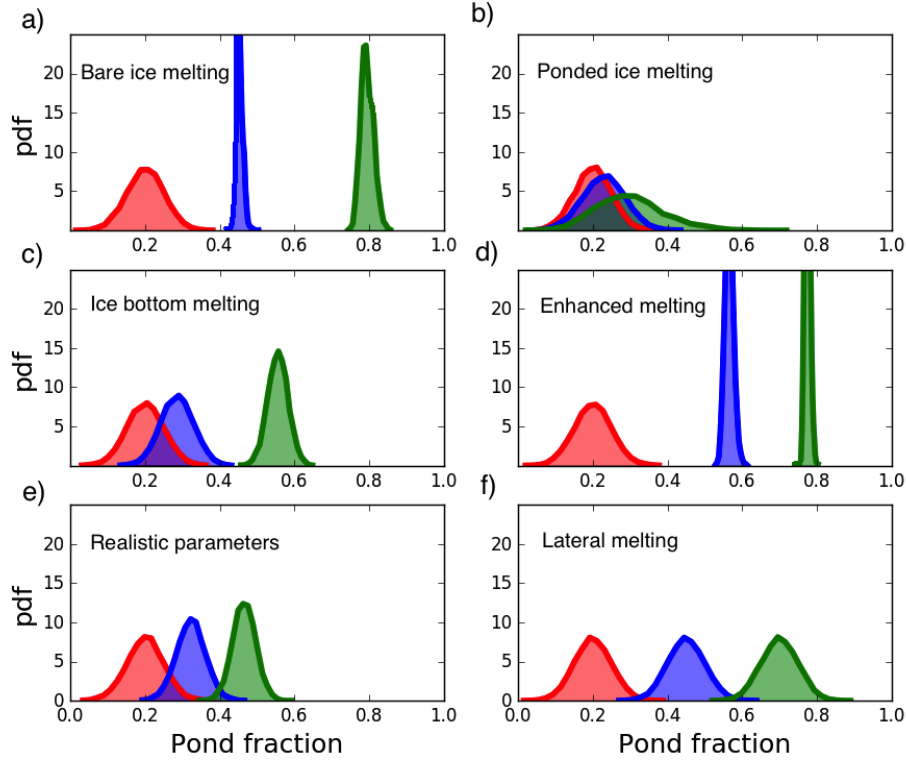

**Figure 9.** In this figure we have evolved an ensemble of  $10^5$  floes with varying initial pond coverage according to Eq. (25) when only one of the growth modes is active. Red curves represent the initial pond fraction distribution, blue curves represent the pond fraction distribution after a time,  $t$ , while the green curves represent the pond fraction distribution after  $2t$ . A time used in panel a is  $t = \frac{1}{2} \frac{1-x_i}{S_{bi}}$ , in panel b it is  $t = \frac{1}{6} \frac{1-x_i}{S_{mp}}$ , and in panels c through f it is  $t = \frac{1}{4} \frac{1-x_i}{S}$ , where  $x_i$  is the mean pond fraction of the initial distribution and  $S$  is an appropriate strength. We show how different growth modes have different effects on the pond fraction distribution. a) Bare ice melting first narrows the distribution, and then widens it. b) Pondered ice melting widens the distribution. c) Bottom ice melting narrows the distribution, while the mean of the distribution increases at an increasing rate. d) Enhanced melting narrows the distribution, while the mean of the distribution increases at a decreasing rate. e) Using realistic parameters, the pond distribution slowly narrows and accelerates. f) Due to lateral melting, pond coverage distribution does not change width, and the growth is linear.

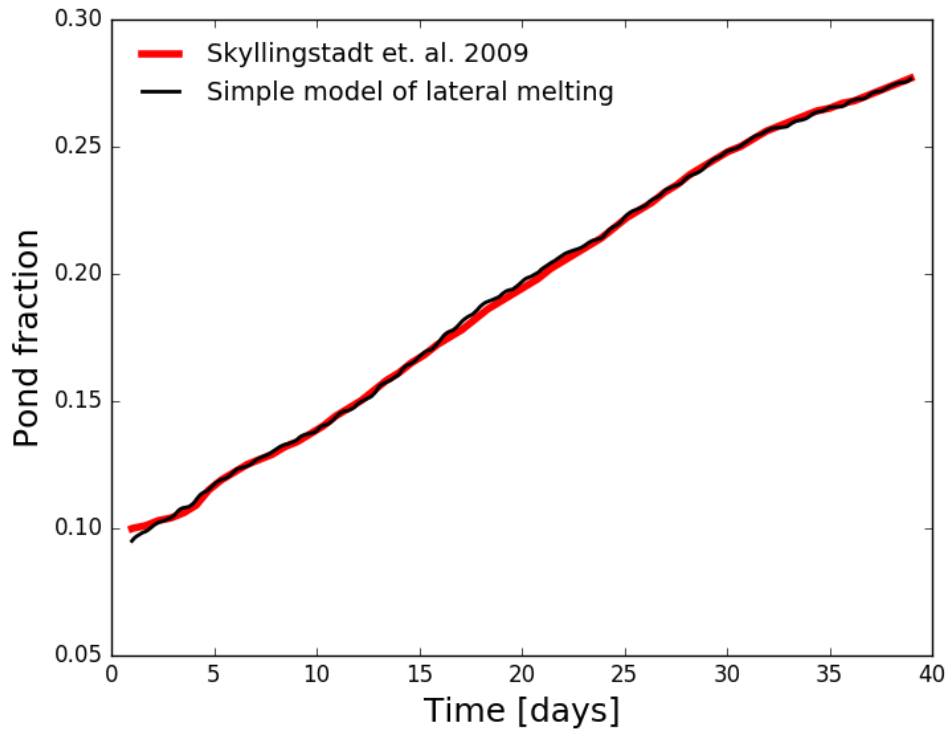

**Figure 10.** The red curve is the results of Skyllingstad et. al. (2009). The black curve is the solution to Eq. (33) with  $\bar{F}_{\text{lat}} = K_{\text{lat}}\bar{F}_{\text{mp}}$ . The pond albedo and the shortwave, longwave, sensible, and latent heat fluxes used to find  $\bar{F}_{\text{mp}}$  are the same as used in Skyllingstad et. al. (2009) and  $K_{\text{lat}} = 1.5$ . A nearly perfect agreement between the two curves suggests that a single non-dimensional constant,  $K_{\text{lat}}$ , is enough to describe pond growth by lateral melting, and the complicated physics of lateral melting are important only in determining the value of  $K_{\text{lat}}$ .



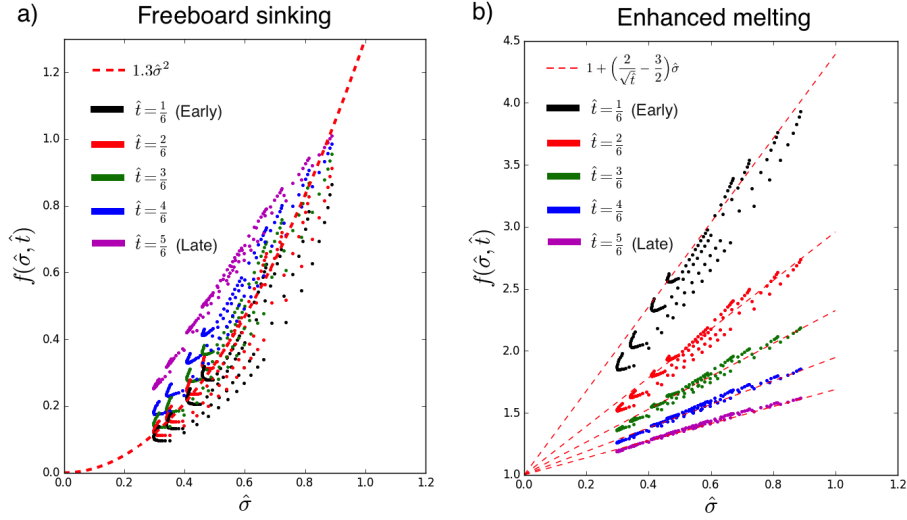

**Figure 11.** Determining the effective strengths,  $S^* \equiv f(\hat{\sigma}, \hat{t})S$ . Points represent estimates of the correction  $f(\hat{\sigma}, \hat{t})$  for each of the curves in Fig. 7 evaluated at different times  $\hat{t} \equiv \frac{St}{1-x_i}$ . The function  $f(\hat{\sigma}, \hat{t})$  is evaluated as  $f(\hat{\sigma}, \hat{t}) \equiv 2(\langle x(t) \rangle - x_i)/(St)$ . Different colors correspond to different times with black corresponding to early in the season and magenta to late in the season. Non-dimensional roughness,  $\hat{\sigma}$ , is shown on the x-axis. a)  $f_{\text{is}}(\hat{\sigma}, \hat{t})$  evaluated for the freeboard sinking curves in Fig. 7a. There is no obvious dependence on  $\hat{t}$ . Freeboard sinking becomes completely suppressed as roughness tends to zero. The dashed red line represents the fit to these estimates of the form  $f_{\text{is}}(\hat{\sigma}, \hat{t}) = a\hat{\sigma}^2$ . b)  $f_{\text{em}}(\hat{\sigma}, \hat{t})$  evaluated for the enhanced melting curves in Fig. 7b. There is a clear dependence on  $\hat{t}$ . Enhanced melting proceeds even as roughness tends to zero. Red dashed lines are fits to these data of the form  $f_{\text{em}}(\hat{\sigma}, \hat{t}) = 1 + c(\hat{t})\hat{\sigma}$ , where  $c(\hat{t}) \equiv \frac{2}{\sqrt{\hat{t}}} - \frac{3}{2}$ .
